# Supplementary material for: Reporting Complete Chloroplast Genome of Endangered Red Mulberry Useful for Understanding Hybridization and Phylogenetic Relationships
Source: Research Square preprint supplement (doi:10.21203/rs.3.rs-5228400/v1), 2025-02-12
Supplement: Supplementary file 1 [file 0bdc0c896cc44d407e9ac479.xlsx]

## Sheet: PQ309088
Table S2: The details of the microsatellites (SSRs) distributed in the cp genome across the studied accessions.
MISA result for Sample 19
SN	SSR Type	Repeats	# nucleotides	Start	End
1	p1	(T)12	12	435	446
2	p1	(A)10	10	1904	1913
3	c	(A)10tgaaattttttgttatc(T)11	38	2065	2102
4	p1	(A)11	11	3903	3913
5	p1	(A)10	10	4764	4773
6	p1	(T)10	10	5209	5218
7	p1	(A)10	10	5330	5339
8	p2	(TA)6	12	5478	5489
9	p1	(T)10	10	8546	8555
10	p1	(A)14	14	8948	8961
11	p1	(T)14	14	9168	9181
12	p1	(A)12	12	9242	9253
13	p1	(A)14	14	9551	9564
14	p1	(T)10	10	10073	10082
15	p1	(T)16	16	12669	12684
16	p1	(T)10	10	13247	13256
17	p1	(A)14	14	13562	13575
18	p5	(AAGGA)3	15	14006	14020
19	p1	(T)10	10	14175	14184
20	p1	(A)11	11	17669	17679
21	p2	(TA)6	12	21266	21277
22	p4	(AAAT)3	12	24088	24099
23	p4	(TATT)3	12	24419	24430
24	p1	(T)12	12	27648	27659
25	p1	(T)10	10	30715	30724
26	p1	(T)10	10	30981	30990
27	p1	(T)10	10	33444	33453
28	p4	(ATTA)3	12	34012	34023
29	p1	(T)10	10	34294	34303
30	p4	(AAAT)3	12	38662	38673
31	p4	(AAAT)3	12	47102	47113
32	p1	(T)12	12	49889	49900
33	p2	(TA)5	10	50078	50087
34	p1	(A)11	11	50178	50188
35	p1	(T)14	14	52265	52278
36	p1	(A)10	10	54425	54434
37	p1	(T)13	13	54459	54471
38	p1	(T)10	10	57529	57538
39	p1	(T)10	10	57984	57993
40	p3	(TAT)4	12	60016	60027
41	p4	(ATTT)3	12	62568	62579
42	p1	(A)14	14	63272	63285
43	p1	(T)13	13	64303	64315
44	p1	(T)10	10	64542	64551
45	p2	(TC)5	10	65022	65031
46	p3	(GTA)5	15	68701	68715
47	p1	(T)13	13	68967	68979
48	p1	(A)11	11	69107	69117
49	p1	(T)10	10	70048	70057
50	p1	(A)10	10	70638	70647
51	p3	(TTA)4	12	71330	71341
52	p3	(TTC)4	12	71430	71441
53	p1	(T)14	14	72992	73005
54	p1	(T)10	10	74481	74490
55	p1	(A)10	10	74690	74699
56	p1	(T)16	16	75201	75216
57	p1	(T)10	10	75744	75753
58	p1	(T)10	10	79178	79187
59	p1	(T)14	14	81845	81858
60	p1	(A)12	12	85066	85077
61	c*	(T)9tc(TTTC)2	19	86293	86311
62	p1	(T)15	15	87408	87422
63	p1	(A)12	12	87934	87945
64	p4	(TCTT)3	12	112040	112051
65	p1	(A)10	10	114628	114637
66	p2	(AT)5	10	116140	116149
67	p1	(A)10	10	116398	116407
68	p1	(A)10	10	116759	116768
69	p4	(ATTA)3	12	116939	116950
70	p1	(T)10	10	117108	117117
71	p2	(AT)6	12	119182	119193
72	c	(AAT)4gctattca(T)18	38	128826	128863
73	p1	(T)10	10	130753	130762
74	p1	(T)11	11	131612	131622
75	p4	(AAAG)3	12	135597	135608
	52
	6
	4
	9
	1
	2
	3

## Sheet: PQ309093
MISA result for Sample 21
SN	SSR Type	Repeats	# nucleotides	Start	End
1	p1	(T)12	12	435	446
2	p1	(A)10	10	1904	1913
3	c	(A)10tgaaattttttgttatc(T)11	38	2065	2102
4	p1	(A)11	11	3903	3913
5	p1	(A)10	10	4764	4773
6	p1	(T)10	10	5209	5218
7	p1	(A)10	10	5330	5339
8	p2	(TA)6	12	5478	5489
9	p1	(T)10	10	8546	8555
10	p1	(A)15	15	8948	8962
11	p1	(T)14	14	9169	9182
12	p1	(A)12	12	9243	9254
13	p1	(A)14	14	9552	9565
14	p1	(T)10	10	10074	10083
15	p1	(T)16	16	12670	12685
16	p1	(T)10	10	13248	13257
17	p1	(A)14	14	13563	13576
18	p5	(AAGGA)3	15	14007	14021
19	p1	(T)11	11	14176	14186
20	p1	(A)11	11	17671	17681
21	p2	(TA)6	12	21268	21279
22	p4	(AAAT)3	12	24090	24101
23	p4	(TATT)3	12	24421	24432
24	p1	(T)12	12	27650	27661
25	p1	(T)10	10	30717	30726
26	p1	(T)10	10	30983	30992
27	p1	(T)10	10	33446	33455
28	p4	(ATTA)3	12	34014	34025
29	p1	(T)10	10	34296	34305
30	p4	(AAAT)3	12	38664	38675
31	p4	(AAAT)3	12	47104	47115
32	p1	(T)12	12	49891	49902
33	p2	(TA)5	10	50080	50089
34	p1	(A)11	11	50180	50190
35	p1	(T)14	14	52267	52280
36	p1	(A)10	10	54427	54436
37	p1	(T)13	13	54461	54473
38	p1	(T)10	10	57531	57540
39	p1	(T)10	10	57986	57995
40	p3	(TAT)4	12	60018	60029
41	p4	(ATTT)3	12	62570	62581
42	p1	(T)10	10	63053	63062
43	p1	(A)14	14	63275	63288
44	p1	(T)12	12	64306	64317
45	p1	(T)10	10	64544	64553
46	p2	(TC)5	10	65024	65033
47	p3	(GTA)5	15	68703	68717
48	p1	(T)13	13	68969	68981
49	p1	(A)11	11	69109	69119
50	p1	(T)10	10	70050	70059
51	p1	(A)10	10	70640	70649
52	p3	(TTA)4	12	71332	71343
53	p3	(TTC)4	12	71432	71443
54	p1	(T)14	14	72994	73007
55	p1	(T)10	10	74483	74492
56	p1	(A)10	10	74692	74701
57	p1	(T)16	16	75203	75218
58	p1	(T)10	10	75746	75755
59	p1	(T)10	10	79180	79189
60	p1	(T)14	14	81847	81860
61	p1	(A)12	12	85068	85079
62	c*	(T)9tc(TTTC)2	19	86295	86313
63	p1	(T)15	15	87410	87424
64	p1	(A)12	12	87936	87947
65	p4	(TCTT)3	12	112042	112053
66	p1	(A)10	10	114630	114639
67	p2	(AT)5	10	116142	116151
68	p1	(A)10	10	116400	116409
69	p1	(A)10	10	116761	116770
70	p4	(ATTA)3	12	116941	116952
71	p1	(T)10	10	117110	117119
72	p2	(AT)6	12	119184	119195
73	c	(AAT)4gctattca(T)18	38	128828	128865
74	p1	(T)10	10	130755	130764
75	p1	(T)11	11	131614	131624
76	p4	(AAAG)3	12	135599	135610
	52
	6
	4
	9
	1
	2
	3

## Sheet: PQ309094
MISA result for Sample 24
SN	SSR Type	Repeats	# nucleotides	Start	End
1	p1	(T)12	12	435	446
2	p1	(A)10	10	1904	1913
3	c	(A)10tgaaattttttgttatc(T)11	38	2065	2102
4	p1	(A)11	11	3903	3913
5	p1	(A)10	10	4764	4773
6	p1	(T)10	10	5209	5218
7	p1	(A)10	10	5330	5339
8	p2	(TA)6	12	5478	5489
9	p1	(T)10	10	8546	8555
10	p1	(A)15	15	8948	8962
11	p1	(T)14	14	9169	9182
12	p1	(A)12	12	9243	9254
13	p1	(A)14	14	9552	9565
14	p1	(T)10	10	10074	10083
15	p1	(T)16	16	12670	12685
16	p1	(T)10	10	13248	13257
17	p1	(A)14	14	13563	13576
18	p5	(AAGGA)3	15	14007	14021
19	p1	(T)11	11	14176	14186
20	p1	(A)11	11	17671	17681
21	p2	(TA)6	12	21268	21279
22	p4	(AAAT)3	12	24090	24101
23	p4	(TATT)3	12	24421	24432
24	p1	(T)12	12	27650	27661
25	p1	(T)10	10	30717	30726
26	p1	(T)10	10	30983	30992
27	p1	(T)10	10	33446	33455
28	p4	(ATTA)3	12	34014	34025
29	p1	(T)10	10	34296	34305
30	p4	(AAAT)3	12	38664	38675
31	p4	(AAAT)3	12	47104	47115
32	p1	(T)12	12	49891	49902
33	p2	(TA)5	10	50080	50089
34	p1	(A)11	11	50180	50190
35	p1	(T)14	14	52267	52280
36	c	(A)10ggtttacttataaatagaattctc(T)13	47	54427	54473
37	p1	(T)10	10	57531	57540
38	p1	(T)10	10	57986	57995
39	p3	(TAT)4	12	60018	60029
40	p4	(ATTT)3	12	62570	62581
41	p1	(T)10	10	63053	63062
42	p1	(A)14	14	63275	63288
43	p1	(T)12	12	64306	64317
44	p1	(T)10	10	64544	64553
45	p2	(TC)5	10	65024	65033
46	p3	(GTA)5	15	68703	68717
47	p1	(T)13	13	68969	68981
48	p1	(A)11	11	69109	69119
49	p1	(T)10	10	70050	70059
50	p1	(A)10	10	70640	70649
51	p3	(TTA)4	12	71332	71343
52	p3	(TTC)4	12	71432	71443
53	p1	(T)14	14	72994	73007
54	p1	(T)10	10	74483	74492
55	p1	(A)10	10	74692	74701
56	p1	(T)16	16	75203	75218
57	p1	(T)10	10	75746	75755
58	p1	(T)10	10	79180	79189
59	p1	(T)14	14	81847	81860
60	p1	(A)12	12	85068	85079
61	c*	(T)9tc(TTTC)2	19	86295	86313
62	p1	(T)15	15	87410	87424
63	p1	(A)12	12	87936	87947
64	p4	(TCTT)3	12	112042	112053
65	p1	(A)10	10	114630	114639
66	p2	(AT)5	10	116142	116151
67	p1	(A)10	10	116400	116409
68	p1	(A)10	10	116761	116770
69	p4	(ATTA)3	12	116941	116952
70	p1	(T)10	10	117110	117119
71	p2	(AT)6	12	119184	119195
72	c	(AAT)4gctattca(T)18	38	128828	128865
73	p1	(T)10	10	130755	130764
74	p1	(T)11	11	131614	131624
75	p4	(AAAG)3	12	135599	135610
	51
	6
	4
	9
	1
	3
	4

## Sheet: PQ309074
MISA result for Sample 25
SN	SSR Type	Repeats	# nucleotides	Start	End
1	p1	(T)12	12	435	446
2	p1	(A)10	10	1904	1913
3	c	(A)10tgaaattttttgttatc(T)11	38	2065	2102
4	p1	(A)11	11	3903	3913
5	p1	(A)10	10	4764	4773
6	p1	(T)10	10	5209	5218
7	p1	(A)10	10	5330	5339
8	p2	(TA)6	12	5478	5489
9	p1	(T)10	10	8546	8555
10	p1	(A)14	14	8948	8961
11	p1	(T)14	14	9168	9181
12	p1	(A)12	12	9242	9253
13	p1	(A)14	14	9551	9564
14	p1	(T)10	10	10073	10082
15	p1	(T)16	16	12669	12684
16	p1	(T)10	10	13247	13256
17	p1	(A)13	13	13562	13574
18	p5	(AAGGA)3	15	14005	14019
19	p1	(T)10	10	14174	14183
20	p1	(A)11	11	17668	17678
21	p1	(T)11	11	17775	17785
22	p2	(TA)6	12	21265	21276
23	p4	(AAAT)3	12	24087	24098
24	p4	(TATT)3	12	24418	24429
25	p1	(T)12	12	27647	27658
26	p1	(T)10	10	30714	30723
27	p1	(T)10	10	30980	30989
28	p1	(T)10	10	33443	33452
29	p4	(ATTA)3	12	34011	34022
30	p1	(T)10	10	34293	34302
31	p4	(AAAT)3	12	38649	38660
32	p4	(AAAT)3	12	47089	47100
33	p1	(T)12	12	49876	49887
34	p2	(TA)5	10	50065	50074
35	p1	(A)11	11	50165	50175
36	p1	(T)14	14	52252	52265
37	p1	(A)10	10	54412	54421
38	p1	(T)13	13	54446	54458
39	p1	(T)10	10	57516	57525
40	p1	(T)10	10	57971	57980
41	p3	(TAT)4	12	60003	60014
42	p4	(ATTT)3	12	62555	62566
43	p1	(A)14	14	63259	63272
44	p1	(T)13	13	64290	64302
45	p1	(T)10	10	64529	64538
46	p2	(TC)5	10	65009	65018
47	p3	(GTA)5	15	68688	68702
48	p1	(T)13	13	68954	68966
49	p1	(A)11	11	69094	69104
50	p1	(T)10	10	70035	70044
51	p1	(A)10	10	70625	70634
52	p3	(TTA)4	12	71317	71328
53	p3	(TTC)4	12	71417	71428
54	p1	(T)14	14	72979	72992
55	p1	(T)10	10	74468	74477
56	p1	(A)10	10	74677	74686
57	p1	(T)16	16	75188	75203
58	p1	(T)10	10	75731	75740
59	p1	(T)10	10	79165	79174
60	p1	(T)14	14	81832	81845
61	p1	(A)12	12	85053	85064
62	c*	(T)9tc(TTTC)2	19	86280	86298
63	p1	(T)15	15	87395	87409
64	p1	(A)12	12	87921	87932
65	p4	(TCTT)3	12	112027	112038
66	p1	(A)10	10	114615	114624
67	p2	(AT)5	10	116127	116136
68	p1	(A)10	10	116385	116394
69	p1	(A)10	10	116746	116755
70	p4	(ATTA)3	12	116926	116937
71	p1	(T)10	10	117095	117104
72	p2	(AT)6	12	119169	119180
73	c	(AAT)4gctattca(T)17	37	128813	128849
74	p1	(T)10	10	130739	130748
75	p1	(T)11	11	131598	131608
76	p4	(AAAG)3	12	135583	135594

## Sheet: PQ309083
MISA result for Sample 27
SN	SSR Type	Repeats	# nucleotides	Start	End
1	p1	(T)12	12	435	446
2	p1	(A)10	10	1904	1913
3	c	(A)10tgaaattttttgttatc(T)11	38	2065	2102
4	p1	(A)11	11	3903	3913
5	p1	(A)10	10	4764	4773
6	p1	(T)10	10	5209	5218
7	p1	(A)10	10	5330	5339
8	p2	(TA)6	12	5478	5489
9	p1	(T)10	10	8546	8555
10	p1	(A)14	14	8948	8961
11	p1	(T)14	14	9168	9181
12	p1	(A)12	12	9242	9253
13	p1	(A)14	14	9551	9564
14	p1	(T)10	10	10073	10082
15	p1	(T)16	16	12669	12684
16	p1	(T)10	10	13247	13256
17	p1	(A)13	13	13562	13574
18	p5	(AAGGA)3	15	14005	14019
19	p1	(T)10	10	14174	14183
20	p1	(A)11	11	17668	17678
21	p1	(T)11	11	17775	17785
22	p2	(TA)6	12	21265	21276
23	p4	(AAAT)3	12	24087	24098
24	p4	(TATT)3	12	24418	24429
25	p1	(T)12	12	27647	27658
26	p1	(T)10	10	30714	30723
27	p1	(T)10	10	30980	30989
28	p1	(T)10	10	33443	33452
29	p4	(ATTA)3	12	34011	34022
30	p1	(T)10	10	34293	34302
31	p4	(AAAT)3	12	38661	38672
32	p4	(AAAT)3	12	47101	47112
33	p1	(T)12	12	49888	49899
34	p2	(TA)5	10	50077	50086
35	p1	(A)11	11	50177	50187
36	p1	(T)14	14	52264	52277
37	p1	(A)10	10	54424	54433
38	p1	(T)13	13	54458	54470
39	p1	(T)10	10	57528	57537
40	p1	(T)10	10	57983	57992
41	p3	(TAT)4	12	60015	60026
42	p4	(ATTT)3	12	62567	62578
43	p1	(A)14	14	63271	63284
44	p1	(T)13	13	64302	64314
45	p1	(T)10	10	64541	64550
46	p2	(TC)5	10	65021	65030
47	p3	(GTA)5	15	68700	68714
48	p1	(T)13	13	68966	68978
49	p1	(A)11	11	69106	69116
50	p1	(T)10	10	70047	70056
51	p1	(A)10	10	70637	70646
52	p3	(TTA)4	12	71329	71340
53	p3	(TTC)4	12	71429	71440
54	p1	(T)14	14	72991	73004
55	p1	(T)10	10	74480	74489
56	p1	(A)10	10	74689	74698
57	p1	(T)16	16	75200	75215
58	p1	(T)10	10	75743	75752
59	p1	(T)10	10	79177	79186
60	p1	(T)14	14	81844	81857
61	p1	(A)12	12	85065	85076
62	c*	(T)9tc(TTTC)2	19	86292	86310
63	p1	(T)15	15	87407	87421
64	p1	(A)12	12	87933	87944
65	p4	(TCTT)3	12	112039	112050
66	p1	(A)10	10	114627	114636
67	p2	(AT)5	10	116139	116148
68	p1	(A)10	10	116397	116406
69	p1	(A)10	10	116758	116767
70	p4	(ATTA)3	12	116938	116949
71	p1	(T)10	10	117107	117116
72	p2	(AT)6	12	119181	119192
73	c	(AAT)4gctattca(T)17	37	128825	128861
74	p1	(T)10	10	130751	130760
75	p1	(T)11	11	131610	131620
76	p4	(AAAG)3	12	135595	135606

## Sheet: PQ309103
MISA result for Sample 29
SN	SSR Type	Repeats	# nucleotides	Start	End
1	p1	(T)12	12	435	446
2	p1	(A)10	10	1904	1913
3	c	(A)10tgaaattttttgttatc(T)11	38	2065	2102
4	p1	(A)11	11	3903	3913
5	p1	(A)10	10	4764	4773
6	p1	(T)10	10	5209	5218
7	p1	(A)10	10	5330	5339
8	p2	(TA)6	12	5478	5489
9	p1	(T)10	10	8546	8555
10	p1	(A)15	15	8948	8962
11	p1	(T)14	14	9169	9182
12	p1	(A)12	12	9243	9254
13	p1	(A)14	14	9552	9565
14	p1	(T)10	10	10074	10083
15	p1	(T)16	16	12670	12685
16	p1	(T)10	10	13248	13257
17	p1	(A)14	14	13563	13576
18	p5	(AAGGA)3	15	14007	14021
19	p1	(T)10	10	14176	14185
20	p1	(A)11	11	17670	17680
21	p2	(TA)6	12	21267	21278
22	p4	(AAAT)3	12	24089	24100
23	p4	(TATT)3	12	24420	24431
24	p1	(T)12	12	27649	27660
25	p1	(T)10	10	30716	30725
26	p1	(T)10	10	30982	30991
27	p1	(T)10	10	33445	33454
28	p4	(ATTA)3	12	34013	34024
29	p1	(T)10	10	34295	34304
30	p4	(AAAT)3	12	38663	38674
31	p4	(AAAT)3	12	47103	47114
32	p1	(T)12	12	49890	49901
33	p2	(TA)5	10	50079	50088
34	p1	(A)11	11	50179	50189
35	p1	(T)14	14	52266	52279
36	p1	(A)10	10	54426	54435
37	p1	(T)13	13	54460	54472
38	p1	(T)10	10	57530	57539
39	p1	(T)10	10	57985	57994
40	p3	(TAT)4	12	60017	60028
41	p4	(ATTT)3	12	62569	62580
42	p1	(T)10	10	63052	63061
43	p1	(A)14	14	63274	63287
44	p1	(T)12	12	64305	64316
45	p1	(T)10	10	64543	64552
46	p2	(TC)5	10	65023	65032
47	p3	(GTA)5	15	68702	68716
48	p1	(T)13	13	68968	68980
49	p1	(A)11	11	69108	69118
50	p1	(T)10	10	70049	70058
51	p1	(A)10	10	70639	70648
52	p3	(TTA)4	12	71331	71342
53	p3	(TTC)4	12	71431	71442
54	p1	(T)14	14	72993	73006
55	p1	(T)10	10	74482	74491
56	p1	(A)10	10	74691	74700
57	p1	(T)16	16	75202	75217
58	p1	(T)10	10	75750	75759
59	p1	(T)10	10	79184	79193
60	p1	(T)14	14	81851	81864
61	p1	(A)12	12	85072	85083
62	c*	(T)9tc(TTTC)2	19	86299	86317
63	p1	(T)15	15	87414	87428
64	p1	(A)12	12	87940	87951
65	p4	(TCTT)3	12	112046	112057
66	p1	(A)10	10	114634	114643
67	p2	(AT)5	10	116146	116155
68	p1	(A)10	10	116404	116413
69	p1	(A)10	10	116765	116774
70	p4	(ATTA)3	12	116945	116956
71	p1	(T)10	10	117114	117123
72	p2	(AT)6	12	119188	119199
73	c	(AAT)4gctattca(T)18	38	128832	128869
74	p1	(T)10	10	130759	130768
75	p1	(T)11	11	131618	131628
76	p4	(AAAG)3	12	135603	135614

## Sheet: PQ309095
MISA result for Sample 31
SN	SSR Type	Repeats	# nucleotides	Start	End
1	p1	(T)12	12	435	446
2	p1	(A)10	10	1904	1913
3	c	(A)10tgaaattttttgttatc(T)11	38	2065	2102
4	p1	(A)11	11	3903	3913
5	p1	(A)10	10	4764	4773
6	p1	(T)10	10	5209	5218
7	p1	(A)10	10	5330	5339
8	p2	(TA)6	12	5478	5489
9	p1	(T)10	10	8546	8555
10	p1	(A)15	15	8948	8962
11	p1	(T)14	14	9169	9182
12	p1	(A)12	12	9243	9254
13	p1	(A)14	14	9552	9565
14	p1	(T)10	10	10074	10083
15	p1	(T)16	16	12670	12685
16	p1	(T)10	10	13248	13257
17	p1	(A)14	14	13563	13576
18	p5	(AAGGA)3	15	14007	14021
19	p1	(T)11	11	14176	14186
20	p1	(A)11	11	17671	17681
21	p2	(TA)6	12	21268	21279
22	p4	(AAAT)3	12	24090	24101
23	p4	(TATT)3	12	24421	24432
24	p1	(T)12	12	27650	27661
25	p1	(T)10	10	30717	30726
26	p1	(T)10	10	30983	30992
27	p1	(T)10	10	33446	33455
28	p4	(ATTA)3	12	34014	34025
29	p1	(T)10	10	34296	34305
30	p4	(AAAT)3	12	38664	38675
31	p4	(AAAT)3	12	47104	47115
32	p1	(T)12	12	49891	49902
33	p2	(TA)5	10	50080	50089
34	p1	(A)11	11	50180	50190
35	p1	(T)14	14	52267	52280
36	p1	(A)10	10	54427	54436
37	p1	(T)13	13	54461	54473
38	p1	(T)10	10	57531	57540
39	p1	(T)10	10	57986	57995
40	p3	(TAT)4	12	60018	60029
41	p4	(ATTT)3	12	62570	62581
42	p1	(T)10	10	63053	63062
43	p1	(A)14	14	63275	63288
44	p1	(T)12	12	64306	64317
45	p1	(T)10	10	64544	64553
46	p2	(TC)5	10	65024	65033
47	p3	(GTA)5	15	68703	68717
48	p1	(T)13	13	68969	68981
49	p1	(A)11	11	69109	69119
50	p1	(T)10	10	70050	70059
51	p1	(A)10	10	70640	70649
52	p3	(TTA)4	12	71332	71343
53	p3	(TTC)4	12	71432	71443
54	p1	(T)14	14	72994	73007
55	p1	(T)10	10	74483	74492
56	p1	(A)10	10	74692	74701
57	p1	(T)16	16	75203	75218
58	p1	(T)10	10	75746	75755
59	p1	(T)10	10	79180	79189
60	p1	(T)14	14	81847	81860
61	p1	(A)12	12	85068	85079
62	c*	(T)9tc(TTTC)2	19	86295	86313
63	p1	(T)15	15	87410	87424
64	p1	(A)12	12	87936	87947
65	p4	(TCTT)3	12	112042	112053
66	p1	(A)10	10	114630	114639
67	p2	(AT)5	10	116142	116151
68	p1	(A)10	10	116400	116409
69	p1	(A)10	10	116761	116770
70	p4	(ATTA)3	12	116941	116952
71	p1	(T)10	10	117110	117119
72	p2	(AT)6	12	119184	119195
73	c	(AAT)4gctattca(T)18	38	128828	128865
74	p1	(T)10	10	130755	130764
75	p1	(T)11	11	131614	131624
76	p4	(AAAG)3	12	135599	135610

## Sheet: PQ309076
MISA result for Sample 34
SN	SSR Type	Repeats	# nucleotides	Start	End
1	p1	(T)12	12	435	446
2	p1	(A)10	10	1904	1913
3	c	(A)10tgaaattttttgttatc(T)11	38	2065	2102
4	p1	(A)11	11	3903	3913
5	p1	(A)10	10	4764	4773
6	p1	(T)10	10	5209	5218
7	p1	(A)10	10	5330	5339
8	p2	(TA)6	12	5478	5489
9	p1	(T)10	10	8546	8555
10	p1	(A)14	14	8948	8961
11	p1	(T)14	14	9168	9181
12	p1	(A)12	12	9242	9253
13	p1	(A)14	14	9551	9564
14	p1	(T)10	10	10073	10082
15	p1	(T)16	16	12669	12684
16	p1	(T)10	10	13247	13256
17	p1	(A)13	13	13562	13574
18	p5	(AAGGA)3	15	14005	14019
19	p1	(T)10	10	14174	14183
20	p1	(A)11	11	17668	17678
21	p1	(T)11	11	17775	17785
22	p2	(TA)6	12	21265	21276
23	p4	(AAAT)3	12	24087	24098
24	p4	(TATT)3	12	24418	24429
25	p1	(T)12	12	27647	27658
26	p1	(T)10	10	30714	30723
27	p1	(T)10	10	30980	30989
28	p1	(T)10	10	33443	33452
29	p4	(ATTA)3	12	34011	34022
30	p1	(T)10	10	34293	34302
31	p4	(AAAT)3	12	38661	38672
32	p4	(AAAT)3	12	47091	47102
33	p1	(T)12	12	49878	49889
34	p2	(TA)5	10	50067	50076
35	p1	(A)11	11	50167	50177
36	p1	(T)14	14	52254	52267
37	p1	(A)10	10	54414	54423
38	p1	(T)13	13	54448	54460
39	p1	(T)10	10	57518	57527
40	p1	(T)10	10	57973	57982
41	p3	(TAT)4	12	60005	60016
42	p4	(ATTT)3	12	62557	62568
43	p1	(A)14	14	63261	63274
44	p1	(T)13	13	64292	64304
45	p1	(T)10	10	64531	64540
46	p2	(TC)5	10	65011	65020
47	p3	(GTA)5	15	68690	68704
48	p1	(T)13	13	68956	68968
49	p1	(A)11	11	69096	69106
50	p1	(T)10	10	70037	70046
51	p1	(A)10	10	70627	70636
52	p3	(TTA)4	12	71319	71330
53	p3	(TTC)4	12	71419	71430
54	p1	(T)14	14	72981	72994
55	p1	(T)10	10	74470	74479
56	p1	(A)10	10	74679	74688
57	p1	(T)16	16	75190	75205
58	p1	(T)10	10	75733	75742
59	p1	(T)10	10	79167	79176
60	p1	(T)14	14	81834	81847
61	p1	(A)12	12	85055	85066
62	c*	(T)9tc(TTTC)2	19	86282	86300
63	p1	(T)15	15	87397	87411
64	p1	(A)12	12	87923	87934
65	p4	(TCTT)3	12	112029	112040
66	p1	(A)10	10	114617	114626
67	p2	(AT)5	10	116129	116138
68	p1	(A)10	10	116387	116396
69	p1	(A)10	10	116748	116757
70	p4	(ATTA)3	12	116928	116939
71	p1	(T)10	10	117097	117106
72	p2	(AT)6	12	119171	119182
73	c	(AAT)4gctattca(T)17	37	128815	128851
74	p1	(T)10	10	130741	130750
75	p1	(T)11	11	131600	131610
76	p4	(AAAG)3	12	135585	135596

## Sheet: PQ309084
MISA result for Sample 36
SN	SSR Type	Repeats	# nucleotides	Start	End
1	p1	(T)12	12	435	446
2	p1	(A)10	10	1904	1913
3	c	(A)10tgaaattttttgttatc(T)11	38	2065	2102
4	p1	(A)11	11	3903	3913
5	p1	(A)10	10	4764	4773
6	p1	(T)10	10	5209	5218
7	p1	(A)10	10	5330	5339
8	p2	(TA)6	12	5478	5489
9	p1	(T)10	10	8546	8555
10	p1	(A)14	14	8948	8961
11	p1	(T)14	14	9168	9181
12	p1	(A)12	12	9242	9253
13	p1	(A)14	14	9551	9564
14	p1	(T)10	10	10073	10082
15	p1	(T)16	16	12669	12684
16	p1	(T)10	10	13247	13256
17	p1	(A)13	13	13562	13574
18	p5	(AAGGA)3	15	14005	14019
19	p1	(T)10	10	14174	14183
20	p1	(A)11	11	17668	17678
21	p1	(T)11	11	17775	17785
22	p2	(TA)6	12	21265	21276
23	p4	(AAAT)3	12	24087	24098
24	p4	(TATT)3	12	24418	24429
25	p1	(T)12	12	27647	27658
26	p1	(T)10	10	30714	30723
27	p1	(T)10	10	30980	30989
28	p1	(T)10	10	33443	33452
29	p4	(ATTA)3	12	34011	34022
30	p1	(T)10	10	34293	34302
31	p4	(AAAT)3	12	38661	38672
32	p4	(AAAT)3	12	47101	47112
33	p1	(T)12	12	49888	49899
34	p2	(TA)5	10	50077	50086
35	p1	(A)11	11	50177	50187
36	p1	(T)14	14	52264	52277
37	c	(A)10ggtttacttataaatagaattctc(T)13	47	54424	54470
38	p1	(T)10	10	57528	57537
39	p1	(T)10	10	57983	57992
40	p3	(TAT)4	12	60015	60026
41	p4	(ATTT)3	12	62567	62578
42	p1	(A)14	14	63271	63284
43	p1	(T)13	13	64302	64314
44	p1	(T)10	10	64541	64550
45	p2	(TC)5	10	65021	65030
46	p3	(GTA)5	15	68700	68714
47	p1	(T)13	13	68966	68978
48	p1	(A)11	11	69106	69116
49	p1	(T)10	10	70047	70056
50	p1	(A)10	10	70637	70646
51	p3	(TTA)4	12	71329	71340
52	p3	(TTC)4	12	71429	71440
53	p1	(T)14	14	72991	73004
54	p1	(T)10	10	74480	74489
55	p1	(A)10	10	74689	74698
56	p1	(T)16	16	75200	75215
57	p1	(T)10	10	75743	75752
58	p1	(T)10	10	79177	79186
59	p1	(T)14	14	81844	81857
60	p1	(A)12	12	85065	85076
61	c*	(T)9tc(TTTC)2	19	86282	86300
62	p1	(T)15	15	87407	87421
63	p1	(A)12	12	87933	87944
64	p4	(TCTT)3	12	112039	112050
65	p1	(A)10	10	114627	114636
66	p2	(AT)5	10	116139	116148
67	p1	(A)10	10	116397	116406
68	p1	(A)10	10	116758	116767
69	p4	(ATTA)3	12	116938	116949
70	p1	(T)10	10	117107	117116
71	p2	(AT)6	12	119181	119192
72	c	(AAT)4gctattca(T)17	37	128825	128861
73	p1	(T)10	10	130751	130760
74	p1	(T)11	11	131610	131620
75	p4	(AAAG)3	12	135595	135606

## Sheet: PQ309078
MISA result for Sample 37
SN	SSR Type	Repeats	# nucleotides	Start	End
1	p1	(T)12	12	435	446
2	p1	(A)10	10	1904	1913
3	c	(A)10tgaaattttttgttatc(T)11	38	2065	2102
4	p1	(A)11	11	3903	3913
5	p1	(A)10	10	4764	4773
6	p1	(T)10	10	5209	5218
7	p1	(A)10	10	5330	5339
8	p2	(TA)6	12	5478	5489
9	p1	(T)10	10	8546	8555
10	p1	(A)14	14	8948	8961
11	p1	(T)14	14	9168	9181
12	p1	(A)12	12	9242	9253
13	p1	(A)14	14	9551	9564
14	p1	(T)10	10	10073	10082
15	p1	(T)16	16	12669	12684
16	p1	(T)10	10	13247	13256
17	p1	(A)13	13	13562	13574
18	p5	(AAGGA)3	15	14005	14019
19	p1	(T)10	10	14174	14183
20	p1	(A)11	11	17668	17678
21	p1	(T)11	11	17775	17785
22	p2	(TA)6	12	21265	21276
23	p4	(AAAT)3	12	24087	24098
24	p4	(TATT)3	12	24418	24429
25	p1	(T)12	12	27647	27658
26	p1	(T)10	10	30714	30723
27	p1	(T)10	10	30980	30989
28	p1	(T)10	10	33443	33452
29	p4	(ATTA)3	12	34011	34022
30	p1	(T)10	10	34293	34302
31	p4	(AAAT)3	12	38661	38672
32	p4	(AAAT)3	12	47091	47102
33	p1	(T)12	12	49878	49889
34	p2	(TA)5	10	50067	50076
35	p1	(A)11	11	50167	50177
36	p1	(T)14	14	52254	52267
37	p1	(A)10	10	54414	54423
38	p1	(T)13	13	54448	54460
39	p1	(T)10	10	57518	57527
40	p1	(T)10	10	57973	57982
41	p3	(TAT)4	12	60005	60016
42	p4	(ATTT)3	12	62557	62568
43	p1	(A)14	14	63261	63274
44	p1	(T)13	13	64292	64304
45	p1	(T)10	10	64531	64540
46	p2	(TC)5	10	65011	65020
47	p3	(GTA)5	15	68690	68704
48	p1	(T)13	13	68956	68968
49	p1	(A)11	11	69096	69106
50	p1	(T)10	10	70037	70046
51	p1	(A)10	10	70627	70636
52	p3	(TTA)4	12	71319	71330
53	p3	(TTC)4	12	71419	71430
54	p1	(T)14	14	72981	72994
55	p1	(T)10	10	74470	74479
56	p1	(A)10	10	74679	74688
57	p1	(T)16	16	75190	75205
58	p1	(T)10	10	75733	75742
59	p1	(T)10	10	79167	79176
60	p1	(T)14	14	81834	81847
61	p1	(A)12	12	85055	85066
62	c*	(T)9tc(TTTC)2	19	86282	86300
63	p1	(T)15	15	87397	87411
64	p1	(A)12	12	87923	87934
65	p4	(TCTT)3	12	112029	112040
66	p1	(A)10	10	114617	114626
67	p2	(AT)5	10	116129	116138
68	p1	(A)10	10	116387	116396
69	p1	(A)10	10	116748	116757
70	p4	(ATTA)3	12	116928	116939
71	p1	(T)10	10	117097	117106
72	p2	(AT)6	12	119171	119182
73	c	(AAT)4gctattca(T)18	38	128815	128852
74	p1	(T)10	10	130742	130751
75	p1	(T)11	11	131601	131611
76	p4	(AAAG)3	12	135586	135597

[truncated: 26 more sheets: PQ309085, PQ309075, PQ309089, PQ309096, PQ309086, PQ309073, PQ309087, PQ309097, PQ309098, PQ309099, PQ309100, PQ309101, PQ309104, PQ309105, PQ309077, PQ309090, PQ309079, PQ309082, PQ309106, PQ309102 …]
