# Supplementary material for: Reporting Complete Chloroplast Genome of Endangered Red Mulberry Useful for Understanding Hybridization and Phylogenetic Relationships
Source: Research Square preprint supplement (doi:10.21203/rs.3.rs-5228400/v1), 2025-02-12
Supplement: Supplementary file 2 [file 27f3d2502dae00d4772c90c1.xlsx]

## Sheet: PQ309088
Table S3: The codons across the non-redundant coding sequences in the cp genome of 45 Morus accessions.
RSCU values obtained by CodonW for Sample 19
Aminoacid	Codon	#Codon	RSCU value	Aminoacid	Codon	#Codon	RSCU value	Aminoacid	Codon	#Codon	RSCU value	Aminoacid	Codon	#Codon	RSCU value
Phe	UUU	893	1.37	Ser	UCU	479	1.72	Tyr	UAU	701	1.63	Cys	UGU	204	1.56
	UUC	409	0.63		UCC	258	0.93		UAC	159	0.37		UGC	57	0.44
Leu	UUA	803	1.99		UCA	344	1.24	TER	UAA	42	1.62	TER	UGA	16	0.62
	UUG	484	1.2		UCG	136	0.49		UAG	20	0.77	Trp	UGG	398	1
	CUU	518	1.28	Pro	CCU	368	1.56	His	CAU	413	1.53	Arg	CGU	298	1.35
	CUC	145	0.36		CCC	167	0.71		CAC	126	0.47		CGC	87	0.39
	CUA	327	0.81		CCA	277	1.17	Gln	CAA	633	1.57		CGA	303	1.37
	CUG	144	0.36		CCG	134	0.57		CAG	171	0.43		CGG	84	0.38
Ile	AUU	982	1.47	Thr	ACU	482	1.68	Asn	AAU	869	1.56	Ser	AGU	346	1.24
	AUC	377	0.57		ACC	204	0.71		AAC	248	0.44		AGC	105	0.38
	AUA	641	0.96		ACA	339	1.18	Lys	AAA	918	1.53	Arg	AGA	416	1.88
Met	AUG	537	1		ACG	122	0.43		AAG	283	0.47		AGG	141	0.64
Val	GUU	456	1.45	Ala	GCU	577	1.85	Asp	GAU	723	1.61	Gly	GGU	529	1.36
	GUC	139	0.44		GCC	182	0.58		GAC	176	0.39		GGC	164	0.42
	GUA	500	1.59		GCA	352	1.13	Glu	GAA	927	1.54		GGA	632	1.62
	GUG	160	0.51		GCG	136	0.44		GAG	278	0.46		GGG	236	0.6
	22775 codons in Average of genes (used Universal Genetic code)

## Sheet: PQ309093
RSCU values obtained by CodonW for Sample 21
Aminoacid	Codon	#Codon	RSCU value	Aminoacid	Codon	#Codon	RSCU value	Aminoacid	Codon	#Codon	RSCU value	Aminoacid	Codon	#Codon	RSCU value
Phe	UUU	893	1.37	Ser	UCU	479	1.72	Tyr	UAU	701	1.63	Cys	UGU	204	1.56
	UUC	409	0.63		UCC	258	0.93		UAC	159	0.37		UGC	57	0.44
Leu	UUA	803	1.99		UCA	344	1.24	TER	UAA	42	1.62	TER	UGA	16	0.62
	UUG	484	1.2		UCG	136	0.49		UAG	20	0.77	Trp	UGG	398	1
	CUU	518	1.28	Pro	CCU	368	1.56	His	CAU	413	1.53	Arg	CGU	298	1.35
	CUC	145	0.36		CCC	167	0.71		CAC	126	0.47		CGC	87	0.39
	CUA	327	0.81		CCA	277	1.17	Gln	CAA	633	1.57		CGA	303	1.37
	CUG	144	0.36		CCG	134	0.57		CAG	171	0.43		CGG	84	0.38
Ile	AUU	982	1.47	Thr	ACU	482	1.68	Asn	AAU	869	1.56	Ser	AGU	346	1.24
	AUC	377	0.57		ACC	204	0.71		AAC	248	0.44		AGC	105	0.38
	AUA	641	0.96		ACA	339	1.18	Lys	AAA	918	1.53	Arg	AGA	416	1.88
Met	AUG	537	1		ACG	122	0.43		AAG	283	0.47		AGG	141	0.64
Val	GUU	455	1.45	Ala	GCU	577	1.85	Asp	GAU	723	1.61	Gly	GGU	529	1.36
	GUC	139	0.44		GCC	182	0.58		GAC	176	0.39		GGC	164	0.42
	GUA	501	1.6		GCA	352	1.13	Glu	GAA	927	1.54		GGA	632	1.62
	GUG	160	0.51		GCG	136	0.44		GAG	278	0.46		GGG	236	0.6
	22775 codons in Average of genes (used Universal Genetic code)

## Sheet: PQ309094
RSCU values obtained by CodonW for Sample 24
Aminoacid	Codon	#Codon	RSCU value	Aminoacid	Codon	#Codon	RSCU value	Aminoacid	Codon	#Codon	RSCU value	Aminoacid	Codon	#Codon	RSCU value
Phe	UUU	893	1.37	Ser	UCU	479	1.72	Tyr	UAU	701	1.63	Cys	UGU	204	1.56
	UUC	409	0.63		UCC	258	0.93		UAC	159	0.37		UGC	57	0.44
Leu	UUA	803	1.99		UCA	344	1.24	TER	UAA	42	1.62	TER	UGA	16	0.62
	UUG	484	1.2		UCG	136	0.49		UAG	20	0.77	Trp	UGG	398	1
	CUU	518	1.28	Pro	CCU	368	1.56	His	CAU	413	1.53	Arg	CGU	298	1.35
	CUC	145	0.36		CCC	167	0.71		CAC	126	0.47		CGC	87	0.39
	CUA	327	0.81		CCA	277	1.17	Gln	CAA	633	1.57		CGA	303	1.37
	CUG	144	0.36		CCG	134	0.57		CAG	171	0.43		CGG	84	0.38
Ile	AUU	982	1.47	Thr	ACU	482	1.68	Asn	AAU	869	1.56	Ser	AGU	346	1.24
	AUC	377	0.57		ACC	204	0.71		AAC	248	0.44		AGC	105	0.38
	AUA	641	0.96		ACA	339	1.18	Lys	AAA	918	1.53	Arg	AGA	416	1.88
Met	AUG	537	1		ACG	122	0.43		AAG	283	0.47		AGG	141	0.64
Val	GUU	455	1.45	Ala	GCU	577	1.85	Asp	GAU	723	1.61	Gly	GGU	529	1.36
	GUC	139	0.44		GCC	182	0.58		GAC	176	0.39		GGC	164	0.42
	GUA	501	1.6		GCA	352	1.13	Glu	GAA	927	1.54		GGA	632	1.62
	GUG	160	0.51		GCG	136	0.44		GAG	278	0.46		GGG	236	0.6
	22775 codons in Average of genes (used Universal Genetic code)

## Sheet: PQ309074
RSCU values obtained by CodonW for Sample 25
Aminoacid	Codon	#Codon	RSCU value	Aminoacid	Codon	#Codon	RSCU value	Aminoacid	Codon	#Codon	RSCU value	Aminoacid	Codon	#Codon	RSCU value
Phe	UUU	893	1.37	Ser	UCU	479	1.72	Tyr	UAU	701	1.63	Cys	UGU	204	1.56
	UUC	409	0.63		UCC	258	0.93		UAC	159	0.37		UGC	57	0.44
Leu	UUA	803	1.99		UCA	344	1.24	TER	UAA	42	1.62	TER	UGA	16	0.62
	UUG	483	1.2		UCG	136	0.49		UAG	20	0.77	Trp	UGG	398	1
	CUU	518	1.28	Pro	CCU	368	1.56	His	CAU	413	1.53	Arg	CGU	298	1.35
	CUC	145	0.36		CCC	167	0.71		CAC	126	0.47		CGC	87	0.39
	CUA	327	0.81		CCA	277	1.17	Gln	CAA	633	1.57		CGA	303	1.37
	CUG	144	0.36		CCG	134	0.57		CAG	171	0.43		CGG	84	0.38
Ile	AUU	982	1.47	Thr	ACU	482	1.68	Asn	AAU	869	1.56	Ser	AGU	346	1.24
	AUC	377	0.57		ACC	204	0.71		AAC	248	0.44		AGC	105	0.38
	AUA	641	0.96		ACA	339	1.18	Lys	AAA	918	1.53	Arg	AGA	416	1.88
Met	AUG	537	1		ACG	122	0.43		AAG	283	0.47		AGG	141	0.64
Val	GUU	455	1.45	Ala	GCU	577	1.85	Asp	GAU	723	1.61	Gly	GGU	529	1.36
	GUC	139	0.44		GCC	182	0.58		GAC	176	0.39		GGC	164	0.42
	GUA	501	1.6		GCA	352	1.13	Glu	GAA	927	1.54		GGA	632	1.62
	GUG	161	0.51		GCG	136	0.44		GAG	278	0.46		GGG	236	0.6
	22775 codons in Average of genes (used Universal Genetic code)

## Sheet: PQ309083
RSCU values obtained by CodonW for Sample 27
Aminoacid	Codon	#Codon	RSCU value	Aminoacid	Codon	#Codon	RSCU value	Aminoacid	Codon	#Codon	RSCU value	Aminoacid	Codon	#Codon	RSCU value
Phe	UUU	893	1.37	Ser	UCU	479	1.72	Tyr	UAU	701	1.63	Cys	UGU	204	1.56
	UUC	409	0.63		UCC	258	0.93		UAC	159	0.37		UGC	57	0.44
Leu	UUA	803	1.99		UCA	344	1.24	TER	UAA	42	1.62	TER	UGA	16	0.62
	UUG	483	1.2		UCG	136	0.49		UAG	20	0.77	Trp	UGG	398	1
	CUU	518	1.28	Pro	CCU	368	1.56	His	CAU	413	1.53	Arg	CGU	298	1.35
	CUC	145	0.36		CCC	167	0.71		CAC	126	0.47		CGC	87	0.39
	CUA	327	0.81		CCA	277	1.17	Gln	CAA	633	1.57		CGA	303	1.37
	CUG	144	0.36		CCG	134	0.57		CAG	171	0.43		CGG	84	0.38
Ile	AUU	982	1.47	Thr	ACU	482	1.68	Asn	AAU	869	1.56	Ser	AGU	346	1.24
	AUC	377	0.57		ACC	204	0.71		AAC	248	0.44		AGC	105	0.38
	AUA	641	0.96		ACA	339	1.18	Lys	AAA	918	1.53	Arg	AGA	416	1.88
Met	AUG	537	1		ACG	122	0.43		AAG	283	0.47		AGG	141	0.64
Val	GUU	455	1.45	Ala	GCU	577	1.85	Asp	GAU	723	1.61	Gly	GGU	529	1.36
	GUC	139	0.44		GCC	182	0.58		GAC	176	0.39		GGC	164	0.42
	GUA	501	1.6		GCA	352	1.13	Glu	GAA	927	1.54		GGA	632	1.62
	GUG	161	0.51		GCG	136	0.44		GAG	278	0.46		GGG	236	0.6
	22775 codons in Average of genes (used Universal Genetic code)

## Sheet: PQ309103
RSCU values obtained by CodonW for Sample 29
Aminoacid	Codon	#Codon	RSCU value	Aminoacid	Codon	#Codon	RSCU value	Aminoacid	Codon	#Codon	RSCU value	Aminoacid	Codon	#Codon	RSCU value
Phe	UUU	893	1.37	Ser	UCU	479	1.72	Tyr	UAU	701	1.63	Cys	UGU	204	1.56
	UUC	409	0.63		UCC	258	0.93		UAC	159	0.37		UGC	57	0.44
Leu	UUA	803	1.99		UCA	344	1.24	TER	UAA	42	1.62	TER	UGA	16	0.62
	UUG	484	1.2		UCG	136	0.49		UAG	20	0.77	Trp	UGG	398	1
	CUU	518	1.28	Pro	CCU	368	1.56	His	CAU	413	1.53	Arg	CGU	298	1.35
	CUC	145	0.36		CCC	167	0.71		CAC	126	0.47		CGC	87	0.39
	CUA	327	0.81		CCA	277	1.17	Gln	CAA	633	1.57		CGA	303	1.37
	CUG	144	0.36		CCG	134	0.57		CAG	171	0.43		CGG	84	0.38
Ile	AUU	982	1.47	Thr	ACU	482	1.68	Asn	AAU	869	1.56	Ser	AGU	346	1.24
	AUC	377	0.57		ACC	204	0.71		AAC	248	0.44		AGC	105	0.38
	AUA	641	0.96		ACA	339	1.18	Lys	AAA	918	1.53	Arg	AGA	416	1.88
Met	AUG	537	1		ACG	122	0.43		AAG	283	0.47		AGG	141	0.64
Val	GUU	455	1.45	Ala	GCU	577	1.85	Asp	GAU	723	1.61	Gly	GGU	529	1.36
	GUC	139	0.44		GCC	182	0.58		GAC	176	0.39		GGC	164	0.42
	GUA	501	1.6		GCA	352	1.13	Glu	GAA	927	1.54		GGA	632	1.62
	GUG	160	0.51		GCG	136	0.44		GAG	278	0.46		GGG	236	0.6
	22775 codons in Average of genes (used Universal Genetic code)

## Sheet: PQ309095
RSCU values obtained by CodonW for Sample 31
Aminoacid	Codon	#Codon	RSCU value	Aminoacid	Codon	#Codon	RSCU value	Aminoacid	Codon	#Codon	RSCU value	Aminoacid	Codon	#Codon	RSCU value
Phe	UUU	893	1.37	Ser	UCU	479	1.72	Tyr	UAU	701	1.63	Cys	UGU	204	1.56
	UUC	409	0.63		UCC	258	0.93		UAC	159	0.37		UGC	57	0.44
Leu	UUA	803	1.99		UCA	344	1.24	TER	UAA	42	1.62	TER	UGA	16	0.62
	UUG	484	1.2		UCG	136	0.49		UAG	20	0.77	Trp	UGG	398	1
	CUU	518	1.28	Pro	CCU	368	1.56	His	CAU	413	1.53	Arg	CGU	298	1.35
	CUC	145	0.36		CCC	167	0.71		CAC	126	0.47		CGC	87	0.39
	CUA	327	0.81		CCA	277	1.17	Gln	CAA	633	1.57		CGA	303	1.37
	CUG	144	0.36		CCG	134	0.57		CAG	171	0.43		CGG	84	0.38
Ile	AUU	982	1.47	Thr	ACU	482	1.68	Asn	AAU	869	1.56	Ser	AGU	346	1.24
	AUC	377	0.57		ACC	204	0.71		AAC	248	0.44		AGC	105	0.38
	AUA	641	0.96		ACA	339	1.18	Lys	AAA	918	1.53	Arg	AGA	416	1.88
Met	AUG	537	1		ACG	122	0.43		AAG	283	0.47		AGG	141	0.64
Val	GUU	455	1.45	Ala	GCU	577	1.85	Asp	GAU	723	1.61	Gly	GGU	529	1.36
	GUC	139	0.44		GCC	182	0.58		GAC	176	0.39		GGC	164	0.42
	GUA	501	1.6		GCA	352	1.13	Glu	GAA	927	1.54		GGA	632	1.62
	GUG	160	0.51		GCG	136	0.44		GAG	278	0.46		GGG	236	0.6
	22775 codons in Average of genes (used Universal Genetic code)

## Sheet: PQ309076
RSCU values obtained by CodonW for Sample 34
Aminoacid	Codon	#Codon	RSCU value	Aminoacid	Codon	#Codon	RSCU value	Aminoacid	Codon	#Codon	RSCU value	Aminoacid	Codon	#Codon	RSCU value
Phe	UUU	893	1.37	Ser	UCU	479	1.72	Tyr	UAU	701	1.63	Cys	UGU	204	1.56
	UUC	409	0.63		UCC	258	0.93		UAC	159	0.37		UGC	57	0.44
Leu	UUA	803	1.99		UCA	344	1.24	TER	UAA	42	1.62	TER	UGA	16	0.62
	UUG	483	1.2		UCG	136	0.49		UAG	20	0.77	Trp	UGG	398	1
	CUU	518	1.28	Pro	CCU	368	1.56	His	CAU	413	1.53	Arg	CGU	298	1.35
	CUC	145	0.36		CCC	167	0.71		CAC	126	0.47		CGC	87	0.39
	CUA	327	0.81		CCA	277	1.17	Gln	CAA	633	1.57		CGA	303	1.37
	CUG	144	0.36		CCG	134	0.57		CAG	171	0.43		CGG	84	0.38
Ile	AUU	982	1.47	Thr	ACU	482	1.68	Asn	AAU	869	1.56	Ser	AGU	346	1.24
	AUC	377	0.57		ACC	204	0.71		AAC	248	0.44		AGC	105	0.38
	AUA	641	0.96		ACA	339	1.18	Lys	AAA	918	1.53	Arg	AGA	416	1.88
Met	AUG	537	1		ACG	122	0.43		AAG	283	0.47		AGG	141	0.64
Val	GUU	455	1.45	Ala	GCU	577	1.85	Asp	GAU	723	1.61	Gly	GGU	529	1.36
	GUC	139	0.44		GCC	182	0.58		GAC	176	0.39		GGC	164	0.42
	GUA	501	1.6		GCA	352	1.13	Glu	GAA	927	1.54		GGA	632	1.62
	GUG	161	0.51		GCG	136	0.44		GAG	278	0.46		GGG	236	0.6
	22775 codons in Average of genes (used Universal Genetic code)

## Sheet: PQ309084
RSCU values obtained by CodonW for Sample 36
Aminoacid	Codon	#Codon	RSCU value	Aminoacid	Codon	#Codon	RSCU value	Aminoacid	Codon	#Codon	RSCU value	Aminoacid	Codon	#Codon	RSCU value
Phe	UUU	893	1.37	Ser	UCU	479	1.72	Tyr	UAU	701	1.63	Cys	UGU	204	1.56
	UUC	409	0.63		UCC	258	0.93		UAC	159	0.37		UGC	57	0.44
Leu	UUA	803	1.99		UCA	344	1.24	TER	UAA	42	1.62	TER	UGA	16	0.62
	UUG	483	1.2		UCG	136	0.49		UAG	20	0.77	Trp	UGG	398	1
	CUU	518	1.28	Pro	CCU	368	1.56	His	CAU	413	1.53	Arg	CGU	298	1.35
	CUC	145	0.36		CCC	167	0.71		CAC	126	0.47		CGC	87	0.39
	CUA	327	0.81		CCA	277	1.17	Gln	CAA	633	1.57		CGA	303	1.37
	CUG	144	0.36		CCG	134	0.57		CAG	171	0.43		CGG	84	0.38
Ile	AUU	982	1.47	Thr	ACU	482	1.68	Asn	AAU	869	1.56	Ser	AGU	346	1.24
	AUC	377	0.57		ACC	204	0.71		AAC	248	0.44		AGC	105	0.38
	AUA	641	0.96		ACA	339	1.18	Lys	AAA	918	1.53	Arg	AGA	416	1.88
Met	AUG	537	1		ACG	122	0.43		AAG	283	0.47		AGG	141	0.64
Val	GUU	455	1.45	Ala	GCU	577	1.85	Asp	GAU	723	1.61	Gly	GGU	529	1.36
	GUC	139	0.44		GCC	182	0.58		GAC	176	0.39		GGC	164	0.42
	GUA	501	1.6		GCA	352	1.13	Glu	GAA	927	1.54		GGA	632	1.62
	GUG	161	0.51		GCG	136	0.44		GAG	278	0.46		GGG	236	0.6
	22775 codons in Average of genes (used Universal Genetic code)

## Sheet: PQ309078
RSCU values obtained by CodonW for Sample 37
Aminoacid	Codon	#Codon	RSCU value	Aminoacid	Codon	#Codon	RSCU value	Aminoacid	Codon	#Codon	RSCU value	Aminoacid	Codon	#Codon	RSCU value
Phe	UUU	893	1.37	Ser	UCU	479	1.72	Tyr	UAU	701	1.63	Cys	UGU	204	1.56
	UUC	409	0.63		UCC	258	0.93		UAC	159	0.37		UGC	57	0.44
Leu	UUA	803	1.99		UCA	344	1.24	TER	UAA	42	1.62	TER	UGA	16	0.62
	UUG	483	1.2		UCG	136	0.49		UAG	20	0.77	Trp	UGG	398	1
	CUU	518	1.28	Pro	CCU	368	1.56	His	CAU	413	1.53	Arg	CGU	298	1.35
	CUC	145	0.36		CCC	167	0.71		CAC	126	0.47		CGC	87	0.39
	CUA	327	0.81		CCA	277	1.17	Gln	CAA	633	1.57		CGA	303	1.37
	CUG	144	0.36		CCG	134	0.57		CAG	171	0.43		CGG	84	0.38
Ile	AUU	982	1.47	Thr	ACU	482	1.68	Asn	AAU	869	1.56	Ser	AGU	346	1.24
	AUC	377	0.57		ACC	204	0.71		AAC	248	0.44		AGC	105	0.38
	AUA	641	0.96		ACA	339	1.18	Lys	AAA	918	1.53	Arg	AGA	416	1.88
Met	AUG	537	1		ACG	122	0.43		AAG	283	0.47		AGG	141	0.64
Val	GUU	455	1.45	Ala	GCU	577	1.85	Asp	GAU	723	1.61	Gly	GGU	529	1.36
	GUC	139	0.44		GCC	182	0.58		GAC	176	0.39		GGC	164	0.42
	GUA	501	1.6		GCA	352	1.13	Glu	GAA	927	1.54		GGA	632	1.62
	GUG	161	0.51		GCG	136	0.44		GAG	278	0.46		GGG	236	0.6
	22775 codons in Average of genes (used Universal Genetic code)

[truncated: 26 more sheets: PQ309085, PQ309075, PQ309089, PQ309096, PQ309086, PQ309073, PQ309087, PQ309097, PQ309098, PQ309099, PQ309100, PQ309101, PQ309104, PQ309105, PQ309077, PQ309090, PQ309079, PQ309082, PQ309106, PQ309081 …]
