# Supplementary material for: Reporting Complete Chloroplast Genome of Endangered Red Mulberry Useful for Understanding Hybridization and Phylogenetic Relationships
Source: Research Square preprint supplement (doi:10.21203/rs.3.rs-5228400/v1), 2025-02-12
Supplement: Supplementary file 3 [file 5f02671db369669cbc913863.xlsx]

## Sheet: PQ309088
Table S1: The repeat sequences present across the 45 Morus cp genome accessions in this study.
# nucleotides	1st start position	Type of repeat	# nucleotides	2nd start position	distance of the repeat	e-value
39	46351	F	39	102414	0	2.36e-14
39	46351	P	39	145195	0	2.36e-14
30	9018	P	30	48064	0	6.2e-09
28	120489	P	28	120533	0	9.92e-08
26	378	P	26	416	0	1.59e-06
25	87402	R	25	87402	0	6.35e-06
24	49419	F	24	49443	0	2.54e-05
24	69278	R	24	125677	0	2.54e-05
24	125672	P	24	125672	0	2.54e-05
23	46351	F	23	125498	0	0.000102
23	102414	F	23	125498	0	0.000102
23	125498	P	23	145211	0	0.000102
22	10594	F	22	39005	0	0.000406
22	10670	P	22	10704	0	0.000406
22	33178	P	22	33178	0	0.000406
22	37694	P	22	48006	0	0.000406
22	64302	F	22	81845	0	0.000406
22	64691	P	22	64691	0	0.000406
22	75291	P	22	75291	0	0.000406
22	118069	P	22	118069	0	0.000406
22	125957	P	22	125957	0	0.000406
21	9024	F	21	37628	0	0.00163
21	33390	F	21	125744	0	0.00163
21	37628	P	21	48067	0	0.00163
21	62371	R	21	62371	0	0.00163
21	68127	F	21	68147	0	0.00163
21	74196	R	21	74196	0	0.00163
21	95475	F	21	95493	0	0.00163
21	95475	P	21	152134	0	0.00163
21	95493	P	21	152152	0	0.00163
21	152134	F	21	152152	0	0.00163
20	9547	R	20	9547	0	0.0065
20	12664	F	20	75196	0	0.0065
20	13487	R	20	81833	0	0.0065
20	33440	F	20	57980	0	0.0065
20	49221	P	20	49221	0	0.0065
20	52262	F	20	81842	0	0.0065
20	53891	R	20	53891	0	0.0065
20	70806	R	20	70806	0	0.0065
20	75292	C	20	118070	0	0.0065
20	75292	R	20	118070	0	0.0065
20	117261	R	20	117261	0	0.0065
20	117365	F	20	117397	0	0.0065
20	118007	P	20	118007	0	0.0065
20	128844	R	20	128844	0	0.0065

## Sheet: PQ309093
Repeat Elements for Sample 21
# nucleotides	1st start position	Type of repeat	# nucleotides	2nd start position	distance of the repeat	e-value
39	46353	F	39	102416	0	2.37e-14
39	46353	P	39	145197	0	2.37e-14
30	9019	P	30	48066	0	6.2e-09
28	120491	P	28	120535	0	9.92e-08
26	378	P	26	416	0	1.59e-06
25	87404	R	25	87404	0	6.35e-06
24	49421	F	24	49445	0	2.54e-05
24	69280	R	24	125679	0	2.54e-05
24	125674	P	24	125674	0	2.54e-05
23	46353	F	23	125500	0	0.000102
23	102416	F	23	125500	0	0.000102
23	125500	P	23	145213	0	0.000102
22	10595	F	22	39007	0	0.000406
22	10671	P	22	10705	0	0.000406
22	33180	P	22	33180	0	0.000406
22	37696	P	22	48008	0	0.000406
22	64693	P	22	64693	0	0.000406
22	75293	P	22	75293	0	0.000406
22	118071	P	22	118071	0	0.000406
22	125959	P	22	125959	0	0.000406
21	9025	F	21	37630	0	0.00163
21	33392	F	21	125746	0	0.00163
21	37630	P	21	48069	0	0.00163
21	62373	R	21	62373	0	0.00163
21	64305	F	21	81848	0	0.00163
21	68129	F	21	68149	0	0.00163
21	74198	R	21	74198	0	0.00163
21	95477	F	21	95495	0	0.00163
21	95477	P	21	152136	0	0.00163
21	95495	P	21	152154	0	0.00163
21	152136	F	21	152154	0	0.00163
20	9548	R	20	9548	0	0.0065
20	12665	F	20	75198	0	0.0065
20	13488	R	20	81835	0	0.0065
20	33442	F	20	57982	0	0.0065
20	49223	P	20	49223	0	0.0065
20	52264	F	20	81844	0	0.0065
20	53893	R	20	53893	0	0.0065
20	70808	R	20	70808	0	0.0065
20	75294	C	20	118072	0	0.0065
20	75294	R	20	118072	0	0.0065
20	117263	R	20	117263	0	0.0065
20	117367	F	20	117399	0	0.0065
20	118009	P	20	118009	0	0.0065
20	128846	R	20	128846	0	0.0065

## Sheet: PQ309094
Repeat Elements for Sample 24
# nucleotides	1st start position	Type of repeat	# nucleotides	2nd start position	distance of the repeat	e-value
39	46353	F	39	102416	0	2.37e-14
39	46353	P	39	145197	0	2.37e-14
30	9019	P	30	48066	0	6.2e-09
28	120491	P	28	120535	0	9.92e-08
26	378	P	26	416	0	1.59e-06
25	87404	R	25	87404	0	6.35e-06
24	49421	F	24	49445	0	2.54e-05
24	69280	R	24	125679	0	2.54e-05
24	125674	P	24	125674	0	2.54e-05
23	46353	F	23	125500	0	0.000102
23	102416	F	23	125500	0	0.000102
23	125500	P	23	145213	0	0.000102
22	10595	F	22	39007	0	0.000406
22	10671	P	22	10705	0	0.000406
22	33180	P	22	33180	0	0.000406
22	37696	P	22	48008	0	0.000406
22	64693	P	22	64693	0	0.000406
22	75293	P	22	75293	0	0.000406
22	118071	P	22	118071	0	0.000406
22	125959	P	22	125959	0	0.000406
21	9025	F	21	37630	0	0.00163
21	33392	F	21	125746	0	0.00163
21	37630	P	21	48069	0	0.00163
21	62373	R	21	62373	0	0.00163
21	64305	F	21	81848	0	0.00163
21	68129	F	21	68149	0	0.00163
21	74198	R	21	74198	0	0.00163
21	95477	F	21	95495	0	0.00163
21	95477	P	21	152136	0	0.00163
21	95495	P	21	152154	0	0.00163
21	152136	F	21	152154	0	0.00163
20	9548	R	20	9548	0	0.0065
20	12665	F	20	75198	0	0.0065
20	13488	R	20	81835	0	0.0065
20	33442	F	20	57982	0	0.0065
20	49223	P	20	49223	0	0.0065
20	52264	F	20	81844	0	0.0065
20	53893	R	20	53893	0	0.0065
20	70808	R	20	70808	0	0.0065
20	75294	C	20	118072	0	0.0065
20	75294	R	20	118072	0	0.0065
20	117263	R	20	117263	0	0.0065
20	117367	F	20	117399	0	0.0065
20	118009	P	20	118009	0	0.0065
20	128846	R	20	128846	0	0.0065

## Sheet: PQ309074
Repeat Elements for Sample 25
# nucleotides	1st start position	Type of repeat	# nucleotides	2nd start position	distance of the repeat	e-value
39	46338	F	39	102401	0	2.36e-14
39	46338	P	39	145181	0	2.36e-14
30	9018	P	30	48051	0	6.2e-09
28	120476	P	28	120520	0	9.92e-08
26	378	P	26	416	0	1.59e-06
25	87389	R	25	87389	0	6.35e-06
24	49406	F	24	49430	0	2.54e-05
24	69265	R	24	125664	0	2.54e-05
24	125659	P	24	125659	0	2.54e-05
23	46338	F	23	125485	0	0.000102
23	102401	F	23	125485	0	0.000102
23	125485	P	23	145197	0	0.000102
22	10594	F	22	38992	0	0.000406
22	10670	P	22	10704	0	0.000406
22	33177	P	22	33177	0	0.000406
22	37693	P	22	47993	0	0.000406
22	64289	F	22	81832	0	0.000406
22	64678	P	22	64678	0	0.000406
22	75278	P	22	75278	0	0.000406
22	118056	P	22	118056	0	0.000406
22	125944	P	22	125944	0	0.000406
21	9024	F	21	37627	0	0.00162
21	33389	F	21	125731	0	0.00162
21	37627	P	21	48054	0	0.00162
21	62358	R	21	62358	0	0.00162
21	68114	F	21	68134	0	0.00162
21	74183	R	21	74183	0	0.00162
21	95462	F	21	95480	0	0.00162
21	95462	P	21	152120	0	0.00162
21	95480	P	21	152138	0	0.00162
21	152120	F	21	152138	0	0.00162
20	9547	R	20	9547	0	0.0065
20	12664	F	20	75183	0	0.0065
20	13487	R	20	81820	0	0.0065
20	33439	F	20	57967	0	0.0065
20	49208	P	20	49208	0	0.0065
20	52249	F	20	81829	0	0.0065
20	53878	R	20	53878	0	0.0065
20	70793	R	20	70793	0	0.0065
20	75279	C	20	118057	0	0.0065
20	75279	R	20	118057	0	0.0065
20	117248	R	20	117248	0	0.0065
20	117352	F	20	117384	0	0.0065
20	117994	P	20	117994	0	0.0065

## Sheet: PQ309083
Repeat Elements for Sample 27
# nucleotides	1st start position	Type of repeat	# nucleotides	2nd start position	distance of the repeat	e-value
39	46350	F	39	102413	0	2.36e-14
39	46350	P	39	145193	0	2.36e-14
30	9018	P	30	48063	0	6.2e-09
28	120488	P	28	120532	0	9.92e-08
26	378	P	26	416	0	1.59e-06
25	87401	R	25	87401	0	6.35e-06
24	49418	F	24	49442	0	2.54e-05
24	69277	R	24	125676	0	2.54e-05
24	125671	P	24	125671	0	2.54e-05
23	46350	F	23	125497	0	0.000102
23	102413	F	23	125497	0	0.000102
23	125497	P	23	145209	0	0.000102
22	10594	F	22	39004	0	0.000406
22	10670	P	22	10704	0	0.000406
22	33177	P	22	33177	0	0.000406
22	37693	P	22	48005	0	0.000406
22	64301	F	22	81844	0	0.000406
22	64690	P	22	64690	0	0.000406
22	75290	P	22	75290	0	0.000406
22	118068	P	22	118068	0	0.000406
22	125956	P	22	125956	0	0.000406
21	9024	F	21	37627	0	0.00163
21	33389	F	21	125743	0	0.00163
21	37627	P	21	48066	0	0.00163
21	62370	R	21	62370	0	0.00163
21	68126	F	21	68146	0	0.00163
21	74195	R	21	74195	0	0.00163
21	95474	F	21	95492	0	0.00163
21	95474	P	21	152132	0	0.00163
21	95492	P	21	152150	0	0.00163
21	152132	F	21	152150	0	0.00163
20	9547	R	20	9547	0	0.0065
20	12664	F	20	75195	0	0.0065
20	13487	R	20	81832	0	0.0065
20	33439	F	20	57979	0	0.0065
20	49220	P	20	49220	0	0.0065
20	52261	F	20	81841	0	0.0065
20	53890	R	20	53890	0	0.0065
20	70805	R	20	70805	0	0.0065
20	75291	C	20	118069	0	0.0065
20	75291	R	20	118069	0	0.0065
20	117260	R	20	117260	0	0.0065
20	117364	F	20	117396	0	0.0065
20	118006	P	20	118006	0	0.0065

## Sheet: PQ309103
Repeat Elements for Sample 29
# nucleotides	1st start position	Type of repeat	# nucleotides	2nd start position	distance of the repeat	e-value
39	46352	F	39	102420	0	2.37e-14
39	46352	P	39	145201	0	2.37e-14
30	9019	P	30	48065	0	6.2e-09
28	120495	P	28	120539	0	9.92e-08
26	378	P	26	416	0	1.59e-06
25	87408	R	25	87408	0	6.35e-06
24	49420	F	24	49444	0	2.54e-05
24	69279	R	24	125683	0	2.54e-05
24	125678	P	24	125678	0	2.54e-05
23	46352	F	23	125504	0	0.000102
23	102420	F	23	125504	0	0.000102
23	125504	P	23	145217	0	0.000102
22	10595	F	22	39006	0	0.000406
22	10671	P	22	10705	0	0.000406
22	33179	P	22	33179	0	0.000406
22	37695	P	22	48007	0	0.000406
22	64692	P	22	64692	0	0.000406
22	75292	P	22	75292	0	0.000406
22	118075	P	22	118075	0	0.000406
22	125963	P	22	125963	0	0.000406
21	9025	F	21	37629	0	0.00163
21	33391	F	21	125750	0	0.00163
21	37629	P	21	48068	0	0.00163
21	62372	R	21	62372	0	0.00163
21	64304	F	21	81852	0	0.00163
21	68128	F	21	68148	0	0.00163
21	74197	R	21	74197	0	0.00163
21	95481	F	21	95499	0	0.00163
21	95481	P	21	152140	0	0.00163
21	95499	P	21	152158	0	0.00163
21	152140	F	21	152158	0	0.00163
20	9548	R	20	9548	0	0.0065
20	12665	F	20	75197	0	0.0065
20	13488	R	20	81839	0	0.0065
20	33441	F	20	57981	0	0.0065
20	49222	P	20	49222	0	0.0065
20	52263	F	20	81848	0	0.0065
20	53892	R	20	53892	0	0.0065
20	70807	R	20	70807	0	0.0065
20	75293	C	20	118076	0	0.0065
20	75293	R	20	118076	0	0.0065
20	117267	R	20	117267	0	0.0065
20	117371	F	20	117403	0	0.0065
20	118013	P	20	118013	0	0.0065
20	128850	R	20	128850	0	0.0065

## Sheet: PQ309095
Repeat Elements for Sample 31
# nucleotides	1st start position	Type of repeat	# nucleotides	2nd start position	distance of the repeat	e-value
39	46353	F	39	102416	0	2.37e-14
39	46353	P	39	145197	0	2.37e-14
30	9019	P	30	48066	0	6.2e-09
28	120491	P	28	120535	0	9.92e-08
26	378	P	26	416	0	1.59e-06
25	87404	R	25	87404	0	6.35e-06
24	49421	F	24	49445	0	2.54e-05
24	69280	R	24	125679	0	2.54e-05
24	125674	P	24	125674	0	2.54e-05
23	46353	F	23	125500	0	0.000102
23	102416	F	23	125500	0	0.000102
23	125500	P	23	145213	0	0.000102
22	10595	F	22	39007	0	0.000406
22	10671	P	22	10705	0	0.000406
22	33180	P	22	33180	0	0.000406
22	37696	P	22	48008	0	0.000406
22	64693	P	22	64693	0	0.000406
22	75293	P	22	75293	0	0.000406
22	118071	P	22	118071	0	0.000406
22	125959	P	22	125959	0	0.000406
21	9025	F	21	37630	0	0.00163
21	33392	F	21	125746	0	0.00163
21	37630	P	21	48069	0	0.00163
21	62373	R	21	62373	0	0.00163
21	64305	F	21	81848	0	0.00163
21	68129	F	21	68149	0	0.00163
21	74198	R	21	74198	0	0.00163
21	95477	F	21	95495	0	0.00163
21	95477	P	21	152136	0	0.00163
21	95495	P	21	152154	0	0.00163
21	152136	F	21	152154	0	0.00163
20	9548	R	20	9548	0	0.0065
20	12665	F	20	75198	0	0.0065
20	13488	R	20	81835	0	0.0065
20	33442	F	20	57982	0	0.0065
20	49223	P	20	49223	0	0.0065
20	52264	F	20	81844	0	0.0065
20	53893	R	20	53893	0	0.0065
20	70808	R	20	70808	0	0.0065
20	75294	C	20	118072	0	0.0065
20	75294	R	20	118072	0	0.0065
20	117263	R	20	117263	0	0.0065
20	117367	F	20	117399	0	0.0065
20	118009	P	20	118009	0	0.0065
20	128846	R	20	128846	0	0.0065

## Sheet: PQ309076
Repeat Elements for Sample 34
# nucleotides	1st start position	Type of repeat	# nucleotides	2nd start position	distance of the repeat	e-value
39	46340	F	39	102403	0	2.36e-14
39	46340	P	39	145183	0	2.36e-14
30	9018	P	30	48053	0	6.2e-09
28	120478	P	28	120522	0	9.92e-08
26	378	P	26	416	0	1.59e-06
25	87391	R	25	87391	0	6.35e-06
24	49408	F	24	49432	0	2.54e-05
24	69267	R	24	125666	0	2.54e-05
24	125661	P	24	125661	0	2.54e-05
23	46340	F	23	125487	0	0.000102
23	102403	F	23	125487	0	0.000102
23	125487	P	23	145199	0	0.000102
22	10594	F	22	39004	0	0.000406
22	10670	P	22	10704	0	0.000406
22	33177	P	22	33177	0	0.000406
22	37693	P	22	47995	0	0.000406
22	64291	F	22	81834	0	0.000406
22	64680	P	22	64680	0	0.000406
22	75280	P	22	75280	0	0.000406
22	118058	P	22	118058	0	0.000406
22	125946	P	22	125946	0	0.000406
21	9024	F	21	37627	0	0.00162
21	33389	F	21	125733	0	0.00162
21	37627	P	21	48056	0	0.00162
21	62360	R	21	62360	0	0.00162
21	68116	F	21	68136	0	0.00162
21	74185	R	21	74185	0	0.00162
21	95464	F	21	95482	0	0.00162
21	95464	P	21	152122	0	0.00162
21	95482	P	21	152140	0	0.00162
21	152122	F	21	152140	0	0.00162
20	9547	R	20	9547	0	0.0065
20	12664	F	20	75185	0	0.0065
20	13487	R	20	81822	0	0.0065
20	33439	F	20	57969	0	0.0065
20	49210	P	20	49210	0	0.0065
20	52251	F	20	81831	0	0.0065
20	53880	R	20	53880	0	0.0065
20	70795	R	20	70795	0	0.0065
20	75281	C	20	118059	0	0.0065
20	75281	R	20	118059	0	0.0065
20	117250	R	20	117250	0	0.0065
20	117354	F	20	117386	0	0.0065
20	117996	P	20	117996	0	0.0065

## Sheet: PQ309084
Repeat Elements for Sample 36
# nucleotides	1st start position	Type of repeat	# nucleotides	2nd start position	distance of the repeat	e-value
39	46350	F	39	102413	0	2.36e-14
39	46350	P	39	145193	0	2.36e-14
30	9018	P	30	48063	0	6.2e-09
28	120488	P	28	120532	0	9.92e-08
26	378	P	26	416	0	1.59e-06
25	87401	R	25	87401	0	6.35e-06
24	49418	F	24	49442	0	2.54e-05
24	69277	R	24	125676	0	2.54e-05
24	125671	P	24	125671	0	2.54e-05
23	46350	F	23	125497	0	0.000102
23	102413	F	23	125497	0	0.000102
23	125497	P	23	145209	0	0.000102
22	10594	F	22	39004	0	0.000406
22	10670	P	22	10704	0	0.000406
22	33177	P	22	33177	0	0.000406
22	37693	P	22	48005	0	0.000406
22	64301	F	22	81844	0	0.000406
22	64690	P	22	64690	0	0.000406
22	75290	P	22	75290	0	0.000406
22	118068	P	22	118068	0	0.000406
22	125956	P	22	125956	0	0.000406
21	9024	F	21	37627	0	0.00163
21	33389	F	21	125743	0	0.00163
21	37627	P	21	48066	0	0.00163
21	62370	R	21	62370	0	0.00163
21	68126	F	21	68146	0	0.00163
21	74195	R	21	74195	0	0.00163
21	95474	F	21	95492	0	0.00163
21	95474	P	21	152132	0	0.00163
21	95492	P	21	152150	0	0.00163
21	152132	F	21	152150	0	0.00163
20	9547	R	20	9547	0	0.0065
20	12664	F	20	75195	0	0.0065
20	13487	R	20	81832	0	0.0065
20	33439	F	20	57979	0	0.0065
20	49220	P	20	49220	0	0.0065
20	52261	F	20	81841	0	0.0065
20	53890	R	20	53890	0	0.0065
20	70805	R	20	70805	0	0.0065
20	75291	C	20	118069	0	0.0065
20	75291	R	20	118069	0	0.0065
20	117260	R	20	117260	0	0.0065
20	117364	F	20	117396	0	0.0065
20	118006	P	20	118006	0	0.0065

## Sheet: PQ309078
Repeat Elements for Sample 37
# nucleotides	1st start position	Type of repeat	# nucleotides	2nd start position	distance of the repeat	e-value
39	46340	F	39	102403	0	2.36e-14
39	46340	P	39	145184	0	2.36e-14
30	9018	P	30	48053	0	6.2e-09
28	120478	P	28	120522	0	9.92e-08
26	378	P	26	416	0	1.59e-06
25	87391	R	25	87391	0	6.35e-06
24	49408	F	24	49432	0	2.54e-05
24	69267	R	24	125666	0	2.54e-05
24	125661	P	24	125661	0	2.54e-05
23	46340	F	23	125487	0	0.000102
23	102403	F	23	125487	0	0.000102
23	125487	P	23	145200	0	0.000102
22	10594	F	22	39004	0	0.000406
22	10670	P	22	10704	0	0.000406
22	33177	P	22	33177	0	0.000406
22	37693	P	22	47995	0	0.000406
22	64291	F	22	81834	0	0.000406
22	64680	P	22	64680	0	0.000406
22	75280	P	22	75280	0	0.000406
22	118058	P	22	118058	0	0.000406
22	125946	P	22	125946	0	0.000406
21	9024	F	21	37627	0	0.00162
21	33389	F	21	125733	0	0.00162
21	37627	P	21	48056	0	0.00162
21	62360	R	21	62360	0	0.00162
21	68116	F	21	68136	0	0.00162
21	74185	R	21	74185	0	0.00162
21	95464	F	21	95482	0	0.00162
21	95464	P	21	152123	0	0.00162
21	95482	P	21	152141	0	0.00162
21	152123	F	21	152141	0	0.00162
20	9547	R	20	9547	0	0.0065
20	12664	F	20	75185	0	0.0065
20	13487	R	20	81822	0	0.0065
20	33439	F	20	57969	0	0.0065
20	49210	P	20	49210	0	0.0065
20	52251	F	20	81831	0	0.0065
20	53880	R	20	53880	0	0.0065
20	70795	R	20	70795	0	0.0065
20	75281	C	20	118059	0	0.0065
20	75281	R	20	118059	0	0.0065
20	117250	R	20	117250	0	0.0065
20	117354	F	20	117386	0	0.0065
20	117996	P	20	117996	0	0.0065
20	128833	R	20	128833	0	0.0065

[truncated: 25 more sheets: PQ309085, PQ309075, PQ309089, PQ309096, PQ309086, PQ309073, PQ309087, PQ309097, PQ309098, PQ309099, PQ309100, PQ309104, PQ309105, PQ309077, PQ309090, PQ309079, PQ309082, PQ309106, PQ309109, PQ309072 …]
