# Supplementary material for: Reporting Complete Chloroplast Genome of Endangered Red Mulberry Useful for Understanding Hybridization and Phylogenetic Relationships
Source: Research Square preprint supplement (doi:10.21203/rs.3.rs-5228400/v1), 2025-02-12
Supplement: Supplementary file 4 [file 98c700f7c43b316e14de4ee7.docx]

**Supplementary materials**

Table S1: The repeat sequences present across the 45 *Morus* cp genome accessions in this study.

Table S2: The details of the microsatellites (SSRs) distributed in the cp genome across the studied accessions.

Table S3: The codons across the non-redundant coding sequences in the cp genome of 45 *Morus* accessions.

Table S4: The sample information along the geo-coordinates of the 45 *Morus* accessions from this study.

Supplemental Data 1: The genome statistics of the assembled *Morus* chloroplasts.

Supplemental Data 2: The haplotypes based on the cp genome.

Supplemental Data 3: The intraspecific DNA polymorphism across *M. rubra* cp genomes.

Supplemental Data 4: The interspecific DNA polymorphism across *M. rubra* and *M. alba* cp genomes.

Supplemental Data 5: The interspecific DNA polymorphism across 12 *Morus* species cp genomes.

Supplemental Data 6: The bash script used in extracting the coding sequences from the genome.

Supplemental Data 7: The detailed procedure of creating the .XML file essential for the “Divergence Time Analysis of *Morus* species based on the chloroplast genome” using BEAUti within BEAST software.
