# Supplementary material for: Reporting Complete Chloroplast Genome of Endangered Red Mulberry Useful for Understanding Hybridization and Phylogenetic Relationships
Source: Research Square preprint supplement (doi:10.21203/rs.3.rs-5228400/v1), 2025-02-12
Supplement: Supplementary file 5 [file e8b0cd510fb17cc11872146e.xlsx]

## Sheet: Genome statistics
Supplemental Data 1: The genome statistics of the assembled Morus chloroplasts.
SN	Specimen details with voucher number		Size (bp)				Total number of				GC content across (%)				Comments
		GenBank Accession #	Genome	LSC	SSC	IR	genes	protein-coding genes	tRNAs	rRNAs	Genome	LSC	SSC	IR
1	Morus alba voucher 014 chloroplast	PQ309062	159293	88071	19842	25690	128	83	37	8	36.2	33.8	29.2	42.9	M. alba genome
2	Morus alba x rubra hybrid voucher 046 chloroplast	PQ309063	159293	88071	19842	25690	128	83	37	8	36.2	33.8	29.2	42.9
3	Morus alba voucher 049 chloroplast	PQ309064	159293	88071	19842	25690	128	83	37	8	36.2	33.8	29.2	42.9
4	Morus alba x rubra hybrid voucher 051 chloroplast	PQ309065	159293	88071	19842	25690	128	83	37	8	36.2	33.8	29.2	42.9
5	Morus alba x rubra hybrid voucher 052 chloroplast	PQ309066	159293	88071	19842	25690	128	83	37	8	36.2	33.8	29.2	42.9
6	Morus alba voucher 0100 chloroplast	PQ309067	159293	88071	19842	25690	128	83	37	8	36.2	33.8	29.2	42.9
7	Morus alba x rubra hybrid voucher #170 chloroplast	PQ309068	159293	88071	19842	25690	128	83	37	8	36.2	33.8	29.2	42.9
8	Morus alba x rubra hybrid voucher 26 chloroplast	PQ309069	159293	88071	19842	25690	128	83	37	8	36.2	33.8	29.2	42.9
9	Morus alba voucher 37 chloroplast	PQ309070	159293	88071	19842	25690	128	83	37	8	36.2	33.8	29.2	42.9
10	Morus alba voucher 41 chloroplast	PQ309071	159293	88071	19842	25690	128	83	37	8	36.2	33.8	29.2	42.9
11	Morus rubra x alba hybrid voucher 31 chloroplast	PQ309072	159393	88207	19841	25674	128	83	37	8	36.1	33.8	29.2	42.9	M. rubra genome
12	Morus rubra voucher 055 chloroplast	PQ309073	159402	88231	19823	25674	128	83	37	8	36.1	33.8	29.2	42.9
13	Morus rubra voucher 025 chloroplast	PQ309074	159403	88218	19837	25674	128	83	37	8	36.1	33.8	29.2	42.9
14	Morus rubra voucher 043 chloroplast	PQ309075	159404	88218	19838	25674	128	83	37	8	36.1	33.8	29.2	42.9
15	Morus rubra voucher 034 chloroplast	PQ309076	159405	88220	19837	25674	128	83	37	8	36.1	33.8	29.2	42.9
16	Morus rubra voucher 175-1 chloroplast	PQ309077	159405	88220	19837	25674	128	83	37	8	36.1	33.8	29.2	42.9
17	Morus rubra voucher 037 chloroplast	PQ309078	159406	88220	19838	25674	128	83	37	8	36.1	33.8	29.2	42.9
18	Morus rubra voucher 180-3 chloroplast	PQ309079	149408	78222	19838	25674	128	83	37	8	36.1	33.8	29.2	42.9
19	Morus rubra voucher Menard-1 chloroplast	PQ309080	159410	88232	19830	25674	128	83	37	8	36.1	33.8	29.2	42.9
20	Morus rubra voucher 172-14 chloroplast	PQ309081	159413	88231	19834	25674	128	83	37	8	36.1	33.8	29.2	42.9
21	Morus rubra rubra voucher 182-1 chloroplast	PQ309082	159414	88228	19838	25674	128	83	37	8	36.1	33.8	29.2	42.9
22	Morus rubra voucher 027 chloroplast	PQ309083	159415	88230	19837	25674	128	83	37	8	36.1	33.8	29.2	42.9
23	Morus rubra voucher 036 chloroplast	PQ309084	159415	88230	19837	25674	128	83	37	8	36.1	33.8	29.2	42.9
24	Morus rubra voucher 041 chloroplast	PQ309085	159415	88230	19837	25674	128	83	37	8	36.1	33.8	29.2	42.9
25	Morus rubra x alba hybrid voucher 050 chloroplast	PQ309086	159416	88231	19837	25674	128	83	37	8	36.1	33.8	29.2	42.9
26	Morus rubra voucher 056 chloroplast	PQ309087	159416	88231	19837	25674	128	83	37	8	36.1	33.8	29.2	42.9
27	Morus rubra voucher 019 chloroplast	PQ309088	159417	88231	19838	25674	128	83	37	8	36.1	33.8	29.2	42.9
28	Morus rubra voucher 044 chloroplast	PQ309089	159417	88231	19838	25674	128	83	37	8	36.1	33.8	29.2	42.9
29	Morus rubra voucher 176-3 chloroplast	PQ309090	159417	88231	19838	25674	128	83	37	8	36.1	33.8	29.2	42.9
30	Morus rubra x alba hybrid voucher 36 chloroplast	PQ309091	159417	88231	19838	25674	128	83	37	8	36.1	33.8	29.2	42.9
31	Morus rubra x alba hybrid voucher 40 chloroplast	PQ309092	159417	88231	19838	25674	128	83	37	8	36.1	33.8	29.2	42.9
32	Morus rubra voucher 021 chloroplast	PQ309093	159419	88233	19838	25674	128	83	37	8	36.1	33.8	29.2	42.9
33	Morus rubra voucher 024 chloroplast	PQ309094	159419	88233	19838	25674	128	83	37	8	36.1	33.8	29.2	42.9
34	Morus rubra voucher 031 chloroplast	PQ309095	159419	88233	19838	25674	128	83	37	8	36.1	33.8	29.2	42.9
35	Morus rubra voucher 048 chloroplast	PQ309096	159419	88233	19838	25674	128	83	37	8	36.1	33.8	29.2	42.9
36	Morus rubra voucher 057 chloroplast	PQ309097	159419	88233	19838	25674	128	83	37	8	36.1	33.8	29.2	42.9
37	Morus rubra voucher 058 chloroplast	PQ309098	159419	88233	19838	25674	128	83	37	8	36.1	33.8	29.2	42.9
38	Morus rubra voucher 059 chloroplast	PQ309099	159419	88233	19838	25674	128	83	37	8	36.1	33.8	29.2	42.9
39	Morus rubra voucher 061 chloroplast	PQ309100	159419	88242	19829	25674	128	83	37	8	36.1	33.8	29.2	42.9
40	Morus rubra voucher 133-14 chloroplast	PQ309101	159422	88236	19838	25674	128	83	37	8	36.1	33.8	29.2	42.9
41	Morus rubra voucher 28 chloroplast	PQ309102	159422	88236	19838	25674	128	83	37	8	36.1	33.8	29.2	42.9
42	Morus rubra voucher 029 chloroplast	PQ309103	159423	88237	19838	25674	128	83	37	8	36.1	33.8	29.2	42.9
43	Morus rubra voucher 171-1 chloroplast	PQ309104	159423	88237	19838	25674	128	83	37	8	36.1	33.8	29.2	42.9
44	Morus rubra voucher 171-4 chloroplast	PQ309105	159423	88237	19838	25674	128	83	37	8	36.1	33.8	29.2	42.9
45	Morus rubra x alba hybrid voucher 182-4 chloroplast	PQ309106	159423	88237	19838	25674	128	83	37	8	36.1	33.8	29.2	42.9
