# Supplementary material for: Reporting Complete Chloroplast Genome of Endangered Red Mulberry Useful for Understanding Hybridization and Phylogenetic Relationships
Source: Research Square preprint supplement (doi:10.21203/rs.3.rs-5228400/v1), 2025-02-12
Supplement: Supplementary file 6 [file ea7aab717f4e9eff2fcb89cb.xlsx]

## Sheet: Sheet1
Table S4: The sample information along the geo-coordinates of the 45 Morus accessions from this study.
SN	Sequence_ID	GenBank Accession #	Voucher Information	Collected_by	Collection_date	Country	State	County	Longitude	Lattitude	Elevation	Place of collection	Specimen_voucher	GenBank Accession #	Voucher deposited at	Comments
1	Seq1	PQ309062	Morus alba voucher 014 chloroplast	Bibek Adhikari & Madhav P. Nepal	2022-06-11	USA	Iowa	Sergent Bluff	-96.3552	42.3748	339m	Garden of I-29 rest stop by Sergent Bluff, Iowa	014	PQ309062	SDSU-SDC
2	Seq2	PQ309063	Morus alba x rubra hybrid voucher 046 chloroplast	Bibek Adhikari & Madhav P. Nepal	2022-06-12	USA	Kansas	Riley	-96.6293	39.1868	327.61	Anneberg Park, Manhattan, Kansas	046	PQ309063	SDSU-SDC
3	Seq3	PQ309064	Morus alba voucher 049 chloroplast	Bibek Adhikari & Madhav P. Nepal	2022-06-12	USA	Kansas	Riley	-96.5951	39.1044	339.085	Konza Prairie Biological Station, Kansas	049	PQ309064	-	Voucher 0100 is representative.
4	Seq4	PQ309065	Morus alba x rubra hybrid voucher 051 chloroplast	Bibek Adhikari & Madhav P. Nepal	2022-06-12	USA	Kansas	Riley	-96.5985	39.1055	343.176	Konza Prairie Biological Station, Kansas	051	PQ309065	SDSU-SDC
5	Seq5	PQ309066	Morus alba x rubra hybrid voucher 052 chloroplast	Bibek Adhikari & Madhav P. Nepal	2022-06-12	USA	Kansas	Riley	-96.5985	39.1056	344.489	Konza Prairie Biological Station, Kansas	052	PQ309066	SDSU-SDC
6	Seq6	PQ309067	Morus alba voucher 0100 chloroplast	Bibek Adhikari & Madhav P. Nepal	2022-06-12	USA	Kansas	Riley	-96.5951	39.1044	339.085	Konza Prairie Biological Station, Kansas	0100	PQ309067	SDSU-SDC	Female tree, a few feet away from the location of Morus alba voucher 049.
7	Seq7	PQ309068	Morus alba x rubra hybrid voucher #170 chloroplast	Jeffrey D. Carstens & Andrew P. Sherwood		USA	Iowa	Jasper	-93.2894	41.8621		Private property in Jasper Co., IA	#170	PQ309068	-	No voucher deposited.
8	Seq8	PQ309069	Morus alba x rubra hybrid voucher 26 chloroplast	Bibek Adhikari	2022-09-16	USA	Nebraska	Richardson	-95.5696	40.2687	297.318	Indian Cave State Park	26	PQ309069	-	Voucher 27 is representative.
9	Seq9	PQ309070	Morus alba voucher 37 chloroplast	Bibek Adhikari	2022-09-16	USA	Nebraska	Richardson	-95.5786	40.2655	350.852	Indian Cave State Park	37	PQ309070	SDSU-SDC
10	Seq10	PQ309071	Morus alba voucher 41 chloroplast	Bibek Adhikari	2022-09-16	USA	Nebraska	Richardson	-95.5985	40.2619	302.368	Indian Cave State Park	41	PQ309071	SDSU-SDC
11	Seq11	PQ309072	Morus rubra x alba hybrid voucher 31 chloroplast	Bibek Adhikari	2022-09-16	USA	Nebraska	Richardson	-95.5619	40.2709	276.936	Indian Cave State Park	31	PQ309072	SDSU-SDC
12	Seq12	PQ309073	Morus rubra voucher 055 chloroplast	Bibek Adhikari & Madhav P. Nepal	2022-06-12	USA	Kansas	Riley	-96.6034	39.1066	326.325	Konza Prairie Biological Station, Kansas	055	PQ309073	SDSU-SDC
13	Seq13	PQ309074	Morus rubra voucher 025 chloroplast	Bibek Adhikari & Madhav P. Nepal	2022-06-11	USA	Nebraska	Richardson	-95.5725	40.2656	340.897	Indian Cave State Park	025	PQ309074	SDSU-SDC
14	Seq14	PQ309075	Morus rubra voucher 043 chloroplast	Bibek Adhikari & Madhav P. Nepal	2022-06-12	USA	Kansas	Riley	-96.6353	39.1824	334.293	Anneberg Park, Manhattan, Kansas	043	PQ309075	SDSU-SDC
15	Seq15	PQ309076	Morus rubra voucher 034 chloroplast	Bibek Adhikari & Madhav P. Nepal	2022-06-11	USA	Nebraska	Richardson	-95.57	40.2686	304.955	Indian Cave State Park	034	PQ309076	SDSU-SDC
16	Seq16	PQ309077	Morus rubra voucher 175-1 chloroplast	Jeffrey D. Carstens & Andrew P. Sherwood	2022-08-04	USA	Oklahoma	Mayes	-95.1207	36.2903	217.986	Mayes Co., OK	175-1	PQ309077	-	No voucher deposited.
17	Seq17	PQ309078	Morus rubra voucher 037 chloroplast	Bibek Adhikari & Madhav P. Nepal	2022-06-12	USA	Kansas	Riley	-96.6353	39.183	324.371	Anneberg Park, Manhattan, Kansas	037	PQ309078	SDSU-SDC
18	Seq18	PQ309079	Morus rubra voucher 180-3 chloroplast	Jeffrey D. Carstens & Andrew P. Sherwood	2022-08-07	USA	Arkansas	Polk	-94.3493	34.5437	282.732	Polk Co., AR	180-3	PQ309079	SDSU-SDC
19	Seq19	PQ309080	Morus rubra voucher Menard-1 chloroplast	Jeffrey D. Carstens & Andrew P. Sherwood		USA	Menard	Illinois	-89.8025	39.9358		Starhill Forest Arboretum., Menard Co., IL	Menard-1	PQ309080	-	No voucher deposited.
20	Seq20	PQ309081	Morus rubra voucher 172-14 chloroplast	Jeffrey D. Carstens & Andrew P. Sherwood	2022-07-12	USA	Iowa	Fremont	-95.6953	40.6857		Waubonsie State Park. Fremont Co., IA	172-14	PQ309081	-	Also represented as 1014-14. Voucher 172-13 is the representative.
21	Seq21	PQ309082	Morus rubra rubra voucher 182-1 chloroplast	Jeffrey D. Carstens & Andrew P. Sherwood	2022-08-08	USA	Missouri	Jackson	-94.5204	38.9877	247.242	Jackson Co., MO	182-1	PQ309082	SDSU-SDC
22	Seq22	PQ309083	Morus rubra voucher 027 chloroplast	Bibek Adhikari & Madhav P. Nepal	2022-06-11	USA	Nebraska	Richardson	-95.5725	40.2653	343.01	Indian Cave State Park	027	PQ309083	SDSU-SDC
23	Seq23	PQ309084	Morus rubra voucher 036 chloroplast	Bibek Adhikari & Madhav P. Nepal	2022-06-12	USA	Kansas	Riley	-95.562	40.2652	333.43	Indian Cave State Park	036	PQ309084	SDSU-SDC
24	Seq24	PQ309085	Morus rubra voucher 041 chloroplast	Bibek Adhikari & Madhav P. Nepal	2022-06-12	USA	Kansas	Riley	-96.6352	39.1827	333.041	Anneberg Park, Manhattan, Kansas	041	PQ309085	SDSU-SDC
25	Seq25	PQ309086	Morus rubra x alba hybrid voucher 050 chloroplast	Bibek Adhikari & Madhav P. Nepal	2022-06-12	USA	Kansas	Riley	-96.5985	39.1055	343.631	Konza Prairie Biological Station, Kansas	050	PQ309086	SDSU-SDC
26	Seq26	PQ309087	Morus rubra voucher 056 chloroplast	Bibek Adhikari & Madhav P. Nepal	2022-06-12	USA	Kansas	Riley	-96.6034	39.1059	326.749	Konza Prairie Biological Station, Kansas	056	PQ309087	SDSU-SDC
27	Seq27	PQ309088	Morus rubra voucher 019 chloroplast	Bibek Adhikari & Madhav P. Nepal	2022-06-11	USA	Nebraska	Richardson	-95.5733	40.2665	329.178	Indian Cave State Park	019	PQ309088	SDSU-SDC
28	Seq28	PQ309089	Morus rubra voucher 044 chloroplast	Bibek Adhikari & Madhav P. Nepal	2022-06-12	USA	Kansas	Riley	-96.6353	39.1821	337.296	Anneberg Park, Manhattan, Kansas	044	PQ309089	SDSU-SDC
29	Seq29	PQ309090	Morus rubra voucher 176-3 chloroplast	Jeffrey D. Carstens & Andrew P. Sherwood	2022-08-05	USA	Texas	Anderson	-95.6114	32.0234	155.194	Anderson Co., TX	176-3	PQ309090	-	No voucher deposited.
30	Seq30	PQ309091	Morus rubra x alba hybrid voucher 36 chloroplast	Bibek Adhikari	2022-09-16	USA	Nebraska	Richardson	-95.562	40.2652	333.43	Indian Cave State Park	36	PQ309091	-
31	Seq31	PQ309092	Morus rubra x alba hybrid voucher 40 chloroplast	Bibek Adhikari	2022-09-16	USA	Nebraska	Richardson	-95.5818	40.2644	344.506	Indian Cave State Park	40	PQ309092	SDSU-SDC
32	Seq32	PQ309093	Morus rubra voucher 021 chloroplast	Bibek Adhikari & Madhav P. Nepal	2022-06-11	USA	Nebraska	Richardson	-95.5727	40.2661	336.666	Indian Cave State Park	021	PQ309093	SDSU-SDC
33	Seq33	PQ309094	Morus rubra voucher 024 chloroplast	Bibek Adhikari & Madhav P. Nepal	2022-06-11	USA	Nebraska	Richardson	-95.5724	40.2662	340.97	Indian Cave State Park	024	PQ309094	SDSU-SDC
34	Seq34	PQ309095	Morus rubra voucher 031 chloroplast	Bibek Adhikari & Madhav P. Nepal	2022-06-11	USA	Nebraska	Richardson	-95.5734	40.2657	324.405	Indian Cave State Park	031	PQ309095	SDSU-SDC
35	Seq35	PQ309096	Morus rubra voucher 048 chloroplast	Bibek Adhikari & Madhav P. Nepal	2022-06-12	USA	Kansas	Riley	-96.6033	39.1068	333.873	Konza Prairie Biological Station, Kansas	048	PQ309096	-	Voucher 047 is representative
36	Seq36	PQ309097	Morus rubra voucher 057 chloroplast	Bibek Adhikari & Madhav P. Nepal	2022-06-12	USA	Kansas	Riley	-96.6031	39.1056	331.075	Konza Prairie Biological Station, Kansas	057	PQ309097	SDSU-SDC
37	Seq37	PQ309098	Morus rubra voucher 058 chloroplast	Bibek Adhikari & Madhav P. Nepal	2022-06-12	USA	Kansas	Riley	-96.603	39.1053	328.801	Konza Prairie Biological Station, Kansas	058	PQ309098	SDSU-SDC
38	Seq38	PQ309099	Morus rubra voucher 059 chloroplast	Bibek Adhikari & Madhav P. Nepal	2022-06-12	USA	Kansas	Riley	-96.6027	39.1051	328.368	Konza Prairie Biological Station, Kansas	059	PQ309099	SDSU-SDC
39	Seq39	PQ309100	Morus rubra voucher 061 chloroplast	Bibek Adhikari & Madhav P. Nepal	2022-06-12	USA	Kansas	Riley	-96.6048	39.1082	337.546	Konza Prairie Biological Station, Kansas	061	PQ309100	-	Voucher 062 is representative
40	Seq40	PQ309101	Morus rubra voucher 133-14 chloroplast	Jeffrey D. Carstens & Andrew P. Sherwood	2022-07-06	USA	Iowa	Polk	-93.3942	41.7474		Chichaqua Bottoms Greenbelt. Polk Co., IA	133-14	PQ309101	SDSU-SDC
41	Seq41	PQ309102	Morus rubra voucher 28 chloroplast	Bibek Adhikari	2022-09-16	USA	Nebraska	Richardson	-95.5679	40.2684	285.155	Indian Cave State Park	28	PQ309102	-	Voucher 29 is representative
42	Seq42	PQ309103	Morus rubra voucher 029 chloroplast	Bibek Adhikari & Madhav P. Nepal	2022-06-11	USA	Nebraska	Richardson	-95.573	40.2658	335.677	Indian Cave State Park	029	PQ309103	SDSU-SDC
43	Seq43	PQ309104	Morus rubra voucher 171-1 chloroplast	Jeffrey D. Carstens & Andrew P. Sherwood	2022-07-06	USA	Iowa	Story	-93.6527	42.0345		Pammel Woods. Story Co., IA	171-1	PQ309104	SDSU-SDC
44	Seq44	PQ309105	Morus rubra voucher 171-4 chloroplast	Jeffrey D. Carstens & Andrew P. Sherwood	2022-07-06	USA	Iowa	Story	-93.6526	42.0341		Pammel Woods. Story Co., IA	171-4	PQ309105	SDSU-SDC
45	Seq45	PQ309106	Morus rubra x alba hybrid voucher 182-4 chloroplast	Jeffrey D. Carstens & Andrew P. Sherwood	2022-08-08	USA	Missouri	Jackson	-94.5127	38.99	274.06	Jackson Co., MO	182-4	PQ309106	-	Voucher 182-1 is representative
															12
	South Dakota State University, C. A. Taylor Herbarium (SDSU-SDC)														33
